# Supplementary material for: Coproduction of healthcare service with immigrant patients: protocol of a scoping review
Source: PubMed Central journal article supplement — BMJ Open. 2018 Feb 3;8(2):e019519. doi: 10.1136/bmjopen-2017-019519 (PMC5829924; doi:10.1136/bmjopen-2017-019519), 2018-02-03
Supplement: bmjopen-2017-019519.draft_revisions.pdf [file bmjopen-2017-019519.draft_revisions.pdf]

# BMJ Open

BMJ Open is committed to open peer review. As part of this commitment we make the peer review history of every article we publish publicly available.

When an article is published we post the peer reviewers' comments and the authors' responses online. We also post the versions of the paper that were used during peer review. These are the versions that the peer review comments apply to.

The versions of the paper that follow are the versions that were submitted during the peer review process. They are not the versions of record or the final published versions. They should not be cited or distributed as the published version of this manuscript.

BMJ Open is an open access journal and the full, final, typeset and author-corrected version of record of the manuscript is available on our site with no access controls, subscription charges or pay-per-view fees (<http://bmjopen.bmj.com>).

If you have any questions on BMJ Open's open peer review process please email [editorial.bmjopen@bmj.com](mailto:editorial.bmjopen@bmj.com)

# BMJ Open

## Coproduction of healthcare services with immigrant patients – protocol of a scoping review

|                                 |                                                                                                                                                                                                                                                                                                                                                                                                 |
|---------------------------------|-------------------------------------------------------------------------------------------------------------------------------------------------------------------------------------------------------------------------------------------------------------------------------------------------------------------------------------------------------------------------------------------------|
| Journal:                        | <i>BMJ Open</i>                                                                                                                                                                                                                                                                                                                                                                                 |
| Manuscript ID                   | bmjopen-2017-019519                                                                                                                                                                                                                                                                                                                                                                             |
| Article Type:                   | Protocol                                                                                                                                                                                                                                                                                                                                                                                        |
| Date Submitted by the Author:   | 07-Sep-2017                                                                                                                                                                                                                                                                                                                                                                                     |
| Complete List of Authors:       | Radl-Karimi, Christina; Region Syddanmark, Center for Quality Nicolaisen, Anne; Region of Southern Denmark, Center for Quality Sodemann, Morten; Odense Universitetshospital, Migrant Health Clinic, Department of Infectious Diseases Q Batalden, Paul; The Dartmouth Institute, Geisel School of Medicine at Dartmouth von Plessen, Christian; Region of Southern Denmark, Center for Quality |
| <b>Primary Subject Heading</b>: | Health services research                                                                                                                                                                                                                                                                                                                                                                        |
| Secondary Subject Heading:      | Communication, Health services research, Patient-centred medicine                                                                                                                                                                                                                                                                                                                               |
| Keywords:                       | Coproduction, Immigrants, Patient-provider relationship, Cross-cultural communication, Collaborative health                                                                                                                                                                                                                                                                                     |
|                                 |                                                                                                                                                                                                                                                                                                                                                                                                 |

SCHOLARONE™  
Manuscripts

Peer Review Only

**Title page****Title:**

Coproduction of healthcare services with immigrant patients – protocol of a scoping review

**Authors:**

1. Corresponding author: Christina Radl-Karimi

Department: Center for Quality

Institution: Region of Southern Denmark

Adresse: P.V. Tuxensvej 3-5, 5500 Middelfart

DENMARK

E-mail: [crk@rsyd.dk](mailto:crk@rsyd.dk)

Phone: 0045 6348 4060

2. Anne Nicolaisen, Center for Quality, Region of Southern Denmark, Middelfart, Denmark

3. Morten Sodemann, Migrant Health Clinic, Department of Infectious Diseases Q, Odense University Hospital, Odense, Denmark

4. Paul Batalden, The Dartmouth Institute, Geisel School of Medicine at Dartmouth, Hanover, New Hampshire, USA

5. Christian von Plessen, Center for Quality, Region of Southern Denmark, Middelfart, Denmark

**Word count: 2857**

## ABSTRACT

### Introduction

Immigrant patients are a heterogeneous population that tend to experience a wide range of barriers when accessing healthcare in their new host country. It is also questionable how standardized strategies such as patient centeredness and patient participation work on this diverse and complex patient group. The concept of coproduction recognizes that all services are coproduced and invites attention to the relationship and communication between patient and care provider. It might provide a new perspective on how to collaboratively create the best possible value for the individual patient. This paper outlines the protocol for a scoping review to identify and examine factors that influence coproduction of healthcare services by immigrants and care providers.

### Methods and analysis

This scoping review will be conducted in accordance with the Joanna Briggs Methodology for scoping reviews. We will search the following electronic databases: PubMed, Scopus, Ovid EMBASE, EBSCO CINAHL, EBSCO PsycInfo, Cochrane Library, Web of Science and Google Scholar. Other non-peer reviewed literature will be identified through Open Grey, Conference Proceedings Index as well as through screening a range of national authorities and research organizations. Additionally, reference lists of the identified relevant articles will be searched. All types of literature will be included if these are concerned with the coproduction of healthcare or social services between immigrants and service providers, including their relationship, communication and collaboration. Eligible publications will be screened independently by two reviewers using a descriptive checklist developed for this scoping review.

### Ethics and dissemination

This scoping review analyses secondary data and does not require ethical approval. The results will facilitate a better understanding of different factors influencing coproduction of health in healthcare between immigrant patients and care providers. Results will be presented at national and international conferences and seminars with relevant stakeholders and be published in a peer-reviewed journal.

**KEYWORDS:** Coproduction, immigrants, patient-provider relationship, cross-cultural communication, collaborative health

#### STRENGTHS AND LIMITATIONS OF THE THIS STUDY

- The literature on social and healthcare service coproduction with immigrant citizens/patients has not been mapped previously. The findings will provide valuable insights on the factors influencing the coproductive relationship between immigrant patients and care providers.
- The broad search strategy goes beyond the term ‘coproduction’, also capturing coproduction elements in other similar concepts dealing with the immigrant-provider relationship (e.g. patient/community involvement, cross-cultural communication), with special attention to fostering the capability for coproduction.
- The scoping review will be conducted in accordance with well-established guidelines and two reviewers will carry out screening and full-text reading independently.
- Given the novelty of the term coproduction, we created a broad search strategy that explicitly includes adjoining concepts.
- Due to the novelty of the term and the therefore broad search strategy, we run the risk of receiving a wide spectrum of results, which can be challenging to overview.

#### INTRODUCTION

Immigrants often experience barriers when accessing healthcare service in their host country. These barriers, often caused by language and cultural differences, lack of social support or challenges related to transportation or employment put them at risk for co-producing and receiving suboptimal care.<sup>1 2</sup> However, suboptimal care can also occur because of unintentional provider behavior. Even care providers who are motivated to be non-prejudiced may stereotype immigrant patients because they struggle with the great diversity of the patient group.<sup>3-5</sup> Immigrant patients do not only differ from the native population, but they also form themselves as a heterogeneous group. They differ by ethnicity, culture, religion or by their reason for migration.<sup>6</sup> This complex mixture of cultures and backgrounds makes it even more challenging for them to develop and to be capable of coproducing a service, to fit in, and to get their health and welfare care needs met.<sup>7</sup>

Based on the growing belief that involving patients can improve the quality of care,<sup>8 9</sup> healthcare systems have over the last decade been infused with innovative strategies for shared decision-making, patient centeredness and participation.<sup>10 11</sup> These approaches might be beneficial for the health literate patient with a clear medical history, but can be challenging for patients as diverse and

1  
2  
3  
4 complex as immigrants.<sup>12 13</sup> Yet, within patient centeredness strategies, the patient still depends to a  
5 certain degree on the care provider<sup>14</sup> which might limit their full effectiveness to improve patient  
6 outcomes.<sup>15</sup> It has been suggested that such, predefined and standardized approaches to the  
7 provision of healthcare services resemble the logic for making a product, rather than a service. As  
8 such, this confusion may contribute to the slow progress of truly patient-centered services.<sup>16</sup> This  
9 suggests that a fresh frame for exploring the relationship between patient and care provider may  
10 offer new insights into how healthcare services might create the best possible value contribution for  
11 the health of all patients, and especially marginalized groups such as immigrant patients.  
12  
13  
14  
15  
16  
17

### 18 **Coproduction of healthcare service**

19  
20 The concept of coproduction has great potential to improve healthcare services using a new  
21 perspective. Originally established in the 1970s by political economist Elinor Ostrom,<sup>17</sup>  
22 coproduction has only recently been introduced to healthcare but is quickly gaining momentum,  
23 both in practice and research.<sup>16 18 19</sup> According to Batalden, coproduction in healthcare is ‘...*the*  
24 *interdependent work of patients (and relatives) and health care professionals to design, create,*  
25 *develop, deliver, assess, and improve relationships and actions that contribute to the health of*  
26 *individuals and populations*’ (Seminar on Coproduction of Healthcare Services, September 21  
27 2016, Middelfart DK).<sup>20</sup> In coproduction, the core of healthcare service provision lies in the  
28 relationship between patient and care provider. The underlying aim of coproduced service is to  
29 contribute to good health for all. This implies sharing values and interdependence between patient  
30 and professional. It involves letting patient and family priorities influence the civil discourse in, the  
31 planning, the implementation of healthcare services.<sup>16</sup>  
32  
33  
34  
35  
36  
37  
38  
39  
40

41 Coproduction is present in any encounter between patient and professional intent on developing and  
42 creating a service. The degree and form of coproduction can vary across time, setting, and  
43 circumstance. In addition, patients and care providers have widely disparate coproduction  
44 dispositions and capacities.<sup>16</sup> Despite the overall optimism around the concept, there are also critical  
45 voices emphasizing that coproduction can not only empower but also exploit patients. Constant  
46 cost-constraint pressure and a reluctance to release power are playing a role in the providers  
47 disability to coproduce.<sup>21</sup> Moreover, service providers need to be able to facilitate, create  
48 relationships, be adaptable as well as act as a link between citizen and system in order for  
49 coproduction to happen.<sup>22 23</sup> Furthermore, some patients with the greatest need for a service may  
50  
51  
52  
53  
54  
55  
56  
57  
58  
59  
60

1  
2  
3  
4 tend to coproduce the least.<sup>24</sup> Other investigations show that if coproduction strategies are designed  
5 to lift the underlying constraints of disadvantaged service users (e.g. lack of knowledge and/or  
6 resources), they may increase both efficiency and equity in the service delivery.<sup>25</sup>  
7  
8  
9

10 In recent years, a multitude of coproduction efforts between the public sector and the civil society  
11 via community-based interventions have been established in Denmark.<sup>26-28</sup> Yet, there is still little  
12 experience with the concept in healthcare service in general, and more specifically with immigrant  
13 citizens. This calls for further investigations on coproduction under varying conditions and testing if  
14 the experiences collected from community-based interventions for immigrant citizens can be  
15 transferred to the healthcare sector. Limits on the capabilities and on who can coproduce and why  
16 are not clear and need to be explored further. The focus on immigrant can render valuable insights  
17 on how to improve the quality of their care and eventually contribute to better health. Namely, there  
18 is a lack of knowledge on both individual (immigrant patient and professional) factors and  
19 contextual (external) factors influencing coproduction of healthcare services in a cross-cultural  
20 healthcare setting.  
21  
22  
23  
24  
25  
26  
27  
28  
29

30 To understand the needs of new and diverse groups of patients and to create health services that can  
31 meet these needs in an interdependent patient-centered way invites a new approach. “Coproduction”  
32 may open new perspectives and possibilities to improve the contribution of healthcare services to  
33 health. Therefore, this article outlines a protocol for a scoping review on the current knowledge on  
34 coproduction of service when immigrants and service providers work together in the healthcare and  
35 community sector.  
36  
37  
38  
39  
40

#### 41 **STUDY DESIGN AND METHODS**

42 The scoping review methodology is particularly useful for systematically examining broad areas of  
43 evidence from disparate and heterogeneous sources and identify key concepts, theories, evidence or  
44 research gaps.<sup>29 30</sup> Thus, the scoping review method fits our purpose of providing a broad overview  
45 of the existing published and un-published literature on coproduction of services between  
46 immigrants and service providers. Unlike systematic reviews, scoping reviews do not focus on the  
47 effectiveness of a specific intervention but are used to map key concepts of a certain research area  
48 and/or to clarify the conceptual boundaries of a topic. Moreover, a scoping review allows for  
49 ongoing reflections, potentially considering emerging evidence and ongoing adjustments to the  
50  
51  
52  
53  
54  
55  
56  
57  
58  
59  
60

1  
2  
3  
4 search strategy. The scoping review will be conducted according to the methodology proposed by  
5 the Joanna Briggs Institute,<sup>31</sup> which is based on the five-stage framework laid out by Arksey &  
6 O'Malley<sup>29</sup> and Levac et al.<sup>30</sup>  
7  
8  
9

### 10 **Stage 1: Identifying the research question**

11 The following research questions will guide the development of the protocol, facilitate the literature  
12 search and provide a structure for the scoping review report:  
13  
14

- 15 - What are **individual factors** influencing coproduction of healthcare or community services  
16 between immigrants and care providers?  
17
- 18 - What are **context-related factors** influencing coproduction of healthcare or community  
19 services between immigrants and care providers?  
20  
21  
22  
23

24  
25 Healthcare services are coproduced by immigrants and service providers and can be influenced by a  
26 variety of individual and context-related factors. Individual factors can influence the capability to  
27 coproduce and can relate to a member of the dyadic, interdependent relationship. Patient-related  
28 factors include sociodemographic backgrounds, previous expectations of and experiences with the  
29 healthcare system or their capacities and attitudes toward involvement. Care provider-related factors  
30 on the other side can for instance relate to the care providers' preparedness and their understanding  
31 of immigrant health need, as well as their attitudes or behaviors toward the immigrant as a patient.  
32 Context-related factors can be either of objective or subjective nature.<sup>32</sup> They can include tangible  
33 (objective) factors such as the organization of an integrated healthcare system, clinical guidelines or  
34 even the clinical surrounding. In contrast, the subjective context focuses on how patients and care  
35 providers interpret and attach significance to what is happening around them and how that  
36 influences their own behavior and interaction with one another.  
37  
38  
39  
40  
41  
42  
43  
44  
45

46 The literature search will cover two potential arenas of coproduction: 1) between immigrant patients  
47 and care providers in the healthcare sector and 2) between immigrant citizens and social service  
48 providers the community sector. Denmark has in recent years seen an increasing interest in  
49 developing new ways of establishing collaborations between citizens and service providers in the  
50 production and delivery of welfare benefits.<sup>26</sup> Therefore, the search includes the social/community  
51 sector because we expect to be able to apply these findings into the healthcare context.  
52  
53  
54  
55  
56  
57  
58  
59  
60



## Stage 2: Identifying relevant studies

We will conduct a systematic search of peer-reviewed literature, including all study designs and methodology. We will also search the non-peer-reviewed literature to identify non-indexed reports, government documents, guidelines, policy papers, dissertations and conference abstracts.

Our preliminary search strategy was developed in consultation with a medical librarian at the University of Southern Denmark (see appendix 1). Elements of coproduction can also be found in other concepts such as patient/citizen involvement and participation, shared-decision making, patient/citizen centeredness and empowerment. Therefore, these concepts will be included in the search strategy of literature from health and social sciences, namely sociology, anthropology and psychology. We will use a three-step search strategy. The first step is an initial limited search in the PubMed and Scopus databases relevant to the topic. This step has already been undertaken on August 16<sup>th</sup> 2017 and yielded 1018 hits in the PubMed and 159 in the Scopus databases. In the second step, we will use all identified keywords and index terms from the initial search and translate them in Ovid EMBASE, EBSCO CINAHL, EBSCO PsycINFO, Cochrane Library, Web of Science and Google Scholar databases. In the third step, we will search the reference lists of the identified relevant articles for additional studies. Other non-peer-reviewed literature will be identified from sources such as Open Grey and Conference Proceedings Index. We will also screen publications by national authorities, research institutions and relevant interest organizations in Denmark and other countries such as United Kingdom or Australia that already have collected comprehensive experiences with the coproduction concept.<sup>24 33</sup>

Full-text publications in English, Scandinavian languages (Danish, Swedish, Norwegian) and German will be considered for inclusion, as the authors can read these languages. The search will be restricted to publications from 2007 onwards when patient-centered care was beginning to take root and appear in medical literature.<sup>34</sup> We will use EndNote to remove duplicates and store bibliographic information.

## Stage 3: Study selection

The PCC (participant, concept, context) mnemonic suggested by the Joanna Briggs Institute (JBI)<sup>31</sup> provides a transparent guide for reviewers and readers and will direct the decision process on which sources to include in the scoping review.

1  
2  
3  
4 (P) Participants

5 In the scoping review we focus on the coproductive relationship between immigrant  
6 patients/citizens and care/service providers. Therefore, both sides of this relationship will be  
7 included as participants. The search will include literature on immigrants of any origin, age and sex.  
8  
9 The International Organisation for Migration (IOM) defines an immigrant as a foreign-born person  
10 who has moved to another country for the purpose of settlement.<sup>35</sup> This definition includes  
11 economic migrants, temporary foreign workers, foreign students, documented and undocumented  
12 migrants, refugees and asylum seekers. Further, we will include literature on descendants (neither of  
13 the parents is born in the country they live in) because they resemble first generation immigrants.<sup>36</sup>  
14  
15 <sup>37</sup> On the service provider side, we will include all types of health professionals and social service  
16 providers that are delivering personal services for immigrants. This can include service providers  
17 from the public/state or the voluntary/non-profit sectors that work on social, health or educational  
18 activities for immigrants on community level.  
19  
20  
21  
22  
23  
24  
25

26 (C) Concept

27  
28 The scoping review will examine the factors that influence patients' and care providers' ability to  
29 coproduce healthcare services. The core of coproduction of health services focuses on the  
30 relationship and actions that arise from the interaction between patients and care providers.<sup>16</sup>  
31  
32 Therefore, we will include publications that focus on the coproductive work and relationships of  
33 immigrant citizens or patients and care or social service providers. This includes face-to-face  
34 encounters between immigrants and service providers, e.g., in consultations as well as group  
35 activities, e.g. shared medical appointments, in which immigrants cocreate strategies with their  
36 peers. We will also include publications on coproduction through networks of immigrants, their  
37 relatives and service providers that cocreate new organisational structures or improvement tools.  
38  
39  
40  
41  
42  
43

44 Additionally, we will include publications on the relationship, communication or collaboration  
45 between immigrants and service providers because they are strongly related to the concept of  
46 coproduction. We will use a broad definition of communication including verbal or non-verbal  
47 behavior, interaction, or interpersonal knowledge, skills and habits.  
48  
49  
50  
51  
52  
53  
54  
55  
56  
57

### (C) Context

We will consider all settings for coproduction by immigrants and care/service providers in health and social care. Examples in primary healthcare are general practitioners, specialists, pharmacies, home care, nursing homes and community nurses. In the secondary sector, public, private, somatic, and psychiatric hospitals will be included. All types of healthcare services available for patients in ambulatory care, day care, long-term care and social care will also be included. We will also include community settings in which individual immigrant citizens or communities actively participate in delivering social services. The definition of social services used here is: 1) They are *personal* services, rather than services related to the production of goods; 2) They fulfill personal *social* rather than physical or intellectual needs; 3) They focus on *social roles* rather than bodies, intellects or minds, thus distinguishing them from health, education and psychological assistance; 4) Social services are performed by persons on persons in direct *social interactions*.<sup>38</sup>

Two reviewers (RKC and NA) will screen titles and abstracts against the PCC criteria and mark them

‘include’, ‘exclude’, ‘uncertain’ or ‘relevant for other purposes’. A summary of all inclusion and exclusion criteria in regards to form and content is shown in table 1. If no abstract is available, the entire publication will be read. To ensure reliability between the reviewers, the inclusion/exclusion criteria will be pilot-tested on a random sample of citations. The reviewers will discuss uncertainties or differences. When in doubt, a third reviewer (vPC) will be consulted for the final decision. The same two reviewers will conduct the full-text screening, which again will be pilot-tested on a random sample of articles. No formal quality assessment will be performed.

#### **Stage 4: Charting the data**

One reviewer (RKC) will extract the data using a descriptive charting table designed for this review. The charting table will be pre-tested in collaboration with the second reviewer (NA) on a minimum of five articles to ensure consistency of data extraction. At this stage, the charting table may be further refined if necessary. The following key information will be extracted:

- Author(s)
- Year of publication
- Publication type (e.g. original research, report)
- Study design

- Population characteristic (e.g. patient, citizen, ethnicity, sex, age, morbidity)
- Provider characteristic (e.g. profession)
- Concept described (e.g. coproduction, patient-involvement)
- Context (e.g. country, healthcare setting, community setting)
- Intervention (e.g. goal setting)
- Key findings (e.g. factors influencing the coproductive relationship between immigrants and service providers)

|                                                                                                                                                                                                                                                                                                                                                                                                                                                                                                                                                                                                                                                                                                                                                                                                                                                                                                                                                                                                                                                                                                            |
|------------------------------------------------------------------------------------------------------------------------------------------------------------------------------------------------------------------------------------------------------------------------------------------------------------------------------------------------------------------------------------------------------------------------------------------------------------------------------------------------------------------------------------------------------------------------------------------------------------------------------------------------------------------------------------------------------------------------------------------------------------------------------------------------------------------------------------------------------------------------------------------------------------------------------------------------------------------------------------------------------------------------------------------------------------------------------------------------------------|
| Inclusion criteria are:                                                                                                                                                                                                                                                                                                                                                                                                                                                                                                                                                                                                                                                                                                                                                                                                                                                                                                                                                                                                                                                                                    |
| <ul style="list-style-type: none"> <li>- <b>Languages:</b> Published in English, Danish, Swedish, Norwegian or German languages.</li> <li>- <b>Date:</b> Published from 2007 and onwards.</li> <li>- <b>Peer-reviewed literature:</b> Any study design and methodology.</li> <li>- <b>Non peer-reviewed literature:</b> Reports, government documents, guidelines, policy papers, dissertations and conference abstracts.</li> <li>- <b>Population:</b> Publications that target the relationship between immigrants (patients or citizens) and service providers (care providers or social service providers).</li> <li>- <b>Types of Services:</b> Publications that include knowledge on coproduced services (healthcare, social care) by immigrants and service providers. This can include knowledge regarding communication (verbal, non-verbal, interaction, interpersonal skills), collaborations as well as co-planning and co-executing of services between immigrants and service providers.</li> <li>- <b>Setting:</b> Publications that focus on healthcare or community settings.</li> </ul> |
| Exclusion criteria are:                                                                                                                                                                                                                                                                                                                                                                                                                                                                                                                                                                                                                                                                                                                                                                                                                                                                                                                                                                                                                                                                                    |
| <ul style="list-style-type: none"> <li>- Publications that describe the consequences of a suboptimal patient/citizen-provider relationship, which goes beyond the scope of this review.</li> <li>- Publications that do not provide a coproduction perspective of the service delivery to immigrants, i.e. solely provide a one-sided description of how to improve service delivery for immigrant patients.</li> </ul>                                                                                                                                                                                                                                                                                                                                                                                                                                                                                                                                                                                                                                                                                    |

Table 1 – Inclusion/exclusion criteria

### Stage 5: Collating, summarizing and reporting the results

The scoping review will give an overview of a relatively broad field of literature including a wide range of different publications types. Therefore, special attention will be paid to how the large

amount of data will be presented. A guideline specifically for reporting scoping reviews is currently being developed by a group of researchers at the University of Toronto, but is has not been published yet.<sup>39</sup> We will make efforts to secure use of this new guidance, but failing its availability, we will use a modified version of the Preferred Reporting Items for Systematic Reviews and Meta-Analysis (PRISMA).<sup>40</sup> PRISMA items not appropriate for the purpose of this scoping review (e.g. risk of bias) will be left out. The extracted data will be presented in tabular or diagrammatic form to give an overview of the amount, type and distribution of included literature.

## IMPLICATIONS

Findings of this study will provide an innovative perspective on the coproduced services by immigrant patients and care providers. This study represents the first step of a research program to develop a model of coproduction of healthcare services for immigrant patients. Such a model will be useful in designing and evaluating patient-centered healthcare services for immigrant patients. A timeline for the entire scoping review process can be seen in table 2.

|                  | 2018 |     |     |      |     |     |     |     |     |
|------------------|------|-----|-----|------|-----|-----|-----|-----|-----|
|                  | Jun  | Jul | Aug | Sept | Oct | Nov | Dec | Jan | Feb |
| Writing protocol | ■    | ■   |     |      |     |     |     |     |     |
| Search           |      | ■   | ■   | ■    |     |     |     |     |     |
| Screening        |      |     |     | ■    | ■   |     |     |     |     |
| Analysis         |      |     |     |      | ■   | ■   | ■   |     |     |
| Reporting        |      |     |     |      |     |     | ■   | ■   | ■   |

Table 2 - Timeline for protocol and scoping review

## ETHICS AND DISSEMINATION

This scoping review will include exclusively secondary data, gathered through searching the literature in electronic databases and other online sources. Thus, no ethics committee approval is required for this study. This protocol will support a systematic and transparent process of preparing and conducting the entire review process. The results will be disseminated through presentations at national and international clinical conferences, on relevant seminars and networks on coproduction and/or immigrant health and will be published in a peer-reviewed journal.

1  
2  
3  
4  
5  
6  
7  
8  
9  
10  
11  
12  
13  
14  
15  
16  
17  
18  
19  
20  
21  
22  
23  
24  
25  
26  
27  
28  
29  
30  
31  
32  
33  
34  
35  
36  
37  
38  
39  
40  
41  
42  
43  
44  
45  
46  
47  
48  
49  
50  
51  
52  
53  
54  
55  
56  
57  
58  
59  
60

For peer review only

1  
2  
3  
4 **Acknowledgements:** The authors thank information specialist Line Bruun Hansen from the  
5 University Library at University of Southern Denmark, campus Esbjerg and librarian Berit Alving  
6 from the Videncentret at Odense University Hospital for their expertise provided in guiding the  
7 design of the draft search strategy for this scoping review.  
8  
9

10  
11  
12 **Contributors:** RKC drafted the protocol. NA, BP and SM helped conceptualize the research, and  
13 reviewed and edited the protocol. vPC obtained funding, conceptualized the research and reviewed  
14 and edited the protocol.  
15  
16

17  
18 **Competing interest:** None  
19  
20

21  
22 **Data sharing:** No additional data available  
23  
24

25 **Funding statement:** This study is financed by the Center for Quality in the Region of Southern  
26 Denmark and the Department of Regional Health Research at the University of Southern Denmark.  
27  
28

29  
30 **Ethics approval:** The scoping review will undertake an analysis of secondary data and does not  
31 require ethical approval.  
32  
33

34  
35 **Twitter:** Follow Christina Radl-Karimi at @ChristinaM\_RK  
36  
37  
38  
39  
40  
41  
42  
43  
44  
45  
46  
47  
48  
49  
50  
51  
52  
53  
54  
55  
56  
57  
58  
59  
60

## REFERENCES

1. Woodgate RL, Busolo DS, Crockett M, et al. A qualitative study on African immigrant and refugee families' experiences of accessing primary health care services in Manitoba, Canada: it's not easy! *International journal for equity in health* 2017;16 doi: 10.1186/s12939-016-0510-x
2. Suurmond J, Uiters E, de Bruijne MC, et al. Negative health care experiences of immigrant patients: a qualitative study. *BMC health services research* 2011;11(1):10. doi: 10.1186/1472-6963-11-10
3. Ahmed S, See S, Shommu N, et al. Experiences of communication barriers between physicians and immigrant patients: A systematic review and thematic synthesis. *Patient Experience Journal* 2017;4(1):122-40.
4. Burgess DJ, Fu SS, van Ryn M. Why Do Providers Contribute to Disparities and What Can Be Done About It? *Journal of general internal medicine* 2004;19(11):1154-9. doi: 10.1111/j.1525-1497.2004.30227.x
5. Sodemann M, Kristensen TR, Sangren H, et al. [Barriers to communication between clinicians and immigrants]. *Ugeskr Laeger* 2015;177(35) [published Online First: 2015/09/02]
6. Derose KP, Escarce JJ, Lurie N. Immigrants and health care: sources of vulnerability. *Health affairs (Project Hope)* 2007;26(5):1258-68. doi: 10.1377/hlthaff.26.5.1258 [published Online First: 2007/09/13]
7. Fiscella K, Epstein RM. So much to do, so little time: Care for the socially disadvantaged and the 15-minute visit *Archives of internal medicine* 2008;168(17):1843-52. doi: 10.1001/archinte.168.17.1843
8. Coulter A, Ellins J. Patient-focused interventions: A review of the evidence. London, UK: The Health Foundation, 2006.
9. Wagner EH, Austin BT, Davis C, et al. Improving chronic illness care: translating evidence into action. *Health affairs (Project Hope)* 2001;20(6):64-78. [published Online First: 2002/01/31]
10. Ministry of Health. Nationalt Kvalitetsprogram for Sundhedsområdet 2015-2018. Copenhagen, DK, 2015.
11. Saha S, Beach MC, Cooper LA. Patient Centeredness, Cultural Competence and Healthcare Quality. *Journal of the National Medical Association* 2008;100(11):1275-85.
12. Street RL, Gordon HS, Michael MW, et al. Patient Participation in Medical Consultations: Why Some Patients Are More Involved Than Others. *Medical care* 2005;43(10):960-69.
13. Street RL, Jr., Gordon H, Haidet P. Physicians' communication and perceptions of patients: is it how they look, how they talk, or is it just the doctor? *Social science & medicine* 2007;65(3):586-98. doi: 10.1016/j.socscimed.2007.03.036 [published Online First: 2007/04/28]



- 1  
2  
3  
4 14. Millenson ML. When “patient centred” is no longer enough: the challenge of collaborative  
5 health: an essay by Michael L Millenson. *BMJ (Clinical research ed)* 2017;358 doi:  
6 10.1136/bmj.j3048  
7
- 8 15. Shay LA. Where is the evidence? A systematic review of shared decision making.  
9 2015;35(1):114-31. doi: 10.1177/0272989x14551638  
10
- 11 16. Batalden M, Batalden P, Margolis P, et al. Coproduction of healthcare service. *BMJ quality &*  
12 *safety* 2015 doi: 10.1136/bmjqs-2015-004315  
13
- 14 17. Ostrom E. Crossing the great divide: Coproduction, synergy, and development. *World*  
15 *Development* 1996;24(6):1073-87. doi: [http://dx.doi.org/10.1016/0305-750X\(96\)00023-X](http://dx.doi.org/10.1016/0305-750X(96)00023-X)  
16
- 17 18. Palumbo R. Contextualizing co-production of health care: a systematic literature review.  
18 *International Journal of Public Sector Management* 2015;29(1):72-90. doi: 10.1108/IJPSM-07-  
19 2015-0125  
20
- 21 19. Voorberg WH, Bekkers VJMM, Tummers LG. A Systematic Review of Co-Creation and Co-  
22 Production: Embarking on the social innovation journey. *Public Management Review*  
23 2015;17(9):1333-57. doi: 10.1080/14719037.2014.930505  
24
- 25 20. Batalden P. Coproduction of healthcare service - a seminar with Paul Batalden, September 21  
26 2016. Middelfart DK. , 2016.  
27
- 28 21. Essén A, Värlander SW, Liljedal KT. Co-production in chronic care: exploitation and  
29 empowerment. *European Journal of Marketing* 2016;50(5/6):724-51. doi: doi:10.1108/EJM-02-  
30 2015-0067  
31
- 32 22. Poulsen L. Embedsmandsrollen i borgerdrevet samskabelse - En ny kommunal  
33 embedsmandsrolle [The role of public officials in citizen-driven partnership]. Roskilde University,  
34 2017.  
35
- 36 23. Færch C. Borgerdrevet samskabelse i kommunerne - Embedsmændenes nye rolle [Citizen-  
37 driven co-production in municipalities]. Roskilde University, 2017.  
38
- 39 24. Loeffler E, Power G, Bovaird T, et al. Co-production of health and wellbeing in Scotland.  
40 Birmingham, UK: Governance International, 2013.  
41
- 42 25. Jakobsen M, Andersen SC. Coproduction and Equity in Public Service Delivery. *Public Adm*  
43 *Rev* 2013;73(5):704-13. doi: 10.1111/puar.12094  
44
- 45 26. Andersen LL, Espersen HH. Partnerskaber og samarbejder mellem det offentlige og  
46 civilsamfundet. [Partnerships and cooperation between the public sector and the civil society].  
47 Copenhagen: Socialstyrelsen [The National Board of Social Services], 2017.  
48
- 49 27. Tortzen A. Samskabelse i kommunale rammer - hvordan kan ledelse understøtte samskabelse  
50 [Coproduction in the municipal sector]. Roskilde University, DK, 2016.  
51
- 52 28. Turnaas S. The Professional Side of Co-Production. University of Tampere, 2016.  
53  
54  
55  
56  
57  
58  
59  
60

- 1  
2  
3  
4 29. Arksey H, O'Malley L. Scoping studies: towards a methodological framework. *International*  
5 *Journal of Social Research Methodology* 2005;8(1):19-32. doi: 10.1080/1364557032000119616  
6  
7 30. Levac D, Colquhoun H, O'Brien KK. Scoping studies: advancing the methodology.  
8 *Implementation Science* 2010;5(1):69. doi: 10.1186/1748-5908-5-69  
9  
10 31. Peters MDJ, Godfrey CM, McInerney P, et al. The Joanna Briggs Institute Reviewers' Manual  
11 2015: Methodology for JBI Scoping Reviews. Adelaide, AUS: The Joanna Briggs Institute, 2015.  
12  
13 32. Bate P. Context is everything. In Perspectives on Context. London: The Health Foundation,  
14 2014:1-29.  
15  
16 33. Alford J, Yates S. Co-Production of Public Services in Australia: The Roles of Government  
17 Organisations and Co-Producers. *Aust J Pub Admin* 2016;75(2):159-75. doi: 10.1111/1467-  
18 8500.12157  
19  
20 34. Laine C, Davidoff F. Patient-centered medicine: A professional evolution. *Jama*  
21 1996;275(2):152-56. doi: 10.1001/jama.1996.03530260066035  
22  
23 35. Perruchoud R, Redpath-Cross J. Glossary on Migration. Book Glossary on Migration. Geneva:  
24 International Organisation for Migration (IOM), 2011.  
25  
26 36. Esholdt H, Fuglsang M. Etniske forskelle i patienters oplevelser [Ethnic differences in patient  
27 experiences]. Region Hovedstaden: Enheden for Brugerundersøgelser, 2009.  
28  
29 37. Jervelund SS, Malik S, Ahlmark N, et al. Morbidity, Self-Perceived Health and Mortality  
30 Among non-Western Immigrants and Their Descendants in Denmark in a Life Phase Perspective. *J*  
31 *Immigr Minor Health* 2017;19(2):448-76. doi: 10.1007/s10903-016-0347-9 [published Online First:  
32 2016/03/24]  
33  
34 38. Bahle T. The changing institutionalization of social services in England and Wales, France and  
35 Germany: is the welfare state on the retreat? *Journal of European Social Policy* 2003;13(1):5-20.  
36 doi: doi:10.1177/0958928703013001035  
37  
38 39. Colquhoun HL, Levac D, O'Brien KK, et al. Scoping reviews: time for clarity in definition,  
39 methods, and reporting. *Journal of Clinical Epidemiology* 2014;67(12):1291-94. doi:  
40 <https://doi.org/10.1016/j.jclinepi.2014.03.013>  
41  
42 40. Moher D, Liberati A, Tetzlaff J, et al. Preferred reporting items for systematic reviews and  
43 meta-analyses: the PRISMA statement. *PLoS medicine* 2009;6(7):e1000097. doi:  
44 10.1371/journal.pmed.1000097 [published Online First: 2009/07/22]  
45  
46  
47  
48  
49  
50  
51  
52  
53  
54  
55  
56  
57  
58  
59  
60

1  
2  
3  
4 **Appendix 1 – Search strategy in PubMed, August 16th 2017**  
5  
6

|    | <b>Search terms</b>                                                              | <b>Results</b> |
|----|----------------------------------------------------------------------------------|----------------|
| 7  | 1 Coproduction OR co-production OR coproduce OR co-produce OR                    | 1474           |
| 8  | 9 coproducing OR co-producing                                                    |                |
| 10 | 2 Cocreation OR co-creation OR cocreate OR co-create OR cocreating OR co-        | 320            |
| 11 | 11 creating                                                                      |                |
| 12 | 3 Codesign OR co-design OR codesigning OR co-designing                           | 246            |
| 13 | 4 Cooperation OR co-operation OR cooperate OR co-operate OR cooperating          | 62062          |
| 14 | 15 OR co-operating                                                               |                |
| 16 | 5 Collaboration OR collaborate OR collaborating                                  | 64249          |
| 17 | 6 Co-care                                                                        | 10             |
| 18 | 7 “public participation” OR “public involvement” OR “public empowerment”         | 1239           |
| 19 | 19 OR “public activation”                                                        |                |
| 20 | 8 “community participation” OR “community involvement” OR “community             | 4504           |
| 21 | 22 empowerment” OR “community activation”                                        |                |
| 23 | 9 “patient participation” OR “patient involvement” OR “patient                   | 4864           |
| 24 | 24 empowerment” OR “patient activation”                                          |                |
| 25 | 10 “Relationship-centered care” OR “relationship-centred care”                   | 139            |
| 26 | 11 “patient-centered care” OR “patient-centred care” OR “patient-focused care”   | 4758           |
| 27 | 12 “patient-centered nursing” OR “patient-centred nursing”                       | 74             |
| 28 | 13 “patient-centered communication” OR “patient-centred communication”           | 455            |
| 29 | 14 Patient-centeredness OR patient-centredness                                   | 1032           |
| 30 | 15 “shared decision-making”                                                      | 4731           |
| 31 | 16 “cross-cultural communication”                                                | 164            |
| 32 | 17 “patient-provider relation” OR “patient-provider relations” OR “patient-      | 1578           |
| 33 | 34 provider relationship” OR “patient-provider relationships” OR “patient-       |                |
| 35 | 35 provider communication” OR “patient-provider communications” OR               |                |
| 36 | 36 “patient-provider interaction” OR “patient-provider interactions”             |                |
| 37 | 18 “patient-physician relation” OR “patient-physician relations” OR “patient-    | 2007           |
| 38 | 39 physician relationship” OR “patient-physician relationships” OR “patient-     |                |
| 39 | 40 physician communication” OR “patient-physician communications” OR             |                |
| 40 | 41 “patient-physician interaction” OR “patient-physician interactions”           |                |
| 41 | 42 19 “patient-doctor relation” OR “patient-doctor relations” OR “patient-doctor | 743            |
| 42 | 43 relationship” OR “patient-doctor relationships” OR “patient-doctor            |                |
| 43 | 44 communication” OR “patient-doctor communications” OR “patient-doctor          |                |
| 44 | 45 interaction” OR “patient-doctor interactions”                                 |                |
| 45 | 46 20 “patient-nurse relation” OR “patient-nurse relations” OR “patient-nurse    | 148            |
| 46 | 47 relationship” OR “patient-nurse relationships” OR “patient-nurse              |                |
| 47 | 48 communication” OR “patient-nurse communications” OR “patient-nurse            |                |
| 48 | 49 interaction” OR “patient-nurse interactions”                                  |                |
| 49 | 50 21 “patient-hospital relation” OR “patient-hospital relations” OR “patient-   | 9              |
| 50 | 51 hospital relationship” OR “patient-hospital relationships” OR “patient-       |                |
| 51 | 52 hospital communication” OR “patient-hospital communications” OR               |                |
| 52 | 53 “patient-hospital interaction” OR “patient-hospital interactions”             |                |
| 53 | 54 22 (((("Patient Participation"[Mesh]) OR "Community Participation"[Mesh])     | 268936         |
| 54 | 55 OR "Patient-Centered Care"[Mesh]) OR "Decision Making"[Mesh]) OR              |                |
| 55 | 56                                                                               |                |
| 56 | 57                                                                               |                |
| 57 | 58                                                                               |                |
| 58 | 59                                                                               |                |
| 59 | 60                                                                               |                |

|    |                                                                                                                                             |             |
|----|---------------------------------------------------------------------------------------------------------------------------------------------|-------------|
|    | "Hospital-Patient Relations"[Mesh]) OR "Physician-Patient Relations"[Mesh]                                                                  |             |
| 23 | Or/1-22                                                                                                                                     | 402703      |
| 24 | Migrant OR migrants                                                                                                                         | 15667       |
| 25 | Immigrant OR immigrants                                                                                                                     | 21054       |
| 26 | "ethnic minority" OR "ethnic minorities" OR "ethnic minority group" OR "ethnic minority groups"                                             | 8571        |
| 27 | Refugee OR refugees                                                                                                                         | 8095        |
| 28 | "asylum seeker" OR "asylum seekers"                                                                                                         | 1075        |
| 29 | Descendant OR descendants                                                                                                                   | 4736        |
| 30 | "undocumented immigrant" OR "undocumented immigrants" OR "illegal immigrant" OR "illegal immigrants"                                        | 448         |
| 31 | ((("Emigrants and Immigrants"[Mesh]) OR "Transients and Migrants"[Mesh]) OR "Refugees"[Mesh]) OR "Undocumented Immigrants"[Mesh]            | 25136       |
| 32 | OR/24-31                                                                                                                                    | 60882       |
| 33 | "healthcare service" OR "healthcare services" OR "health care service" OR "health care services"                                            | 18690       |
| 34 | "social service" OR "social services"                                                                                                       | 9253        |
| 35 | "community service" OR "community services"                                                                                                 | 3558        |
| 36 | "community welfare"                                                                                                                         | 69          |
| 37 | "social welfare"                                                                                                                            | 3692        |
| 38 | "delivery of healthcare" OR "delivery of health care"                                                                                       | 11032       |
| 39 | "Integrated delivery of healthcare" OR "Integrated delivery of health care"                                                                 | 15          |
| 40 | ((("Health Services"[Mesh]) OR ("Delivery of Health Care"[Mesh] OR "Delivery of Health Care, Integrated"[Mesh])) OR "Social Welfare"[Mesh]) | 2412683     |
| 41 | OR/33-37                                                                                                                                    | 2425575     |
| 42 | 23 AND 32 AND 38                                                                                                                            | 1725        |
| 43 | 23 AND 32 AND 38 only: English, Swedish, Norwegian, Danish, German                                                                          | 1640        |
| 44 | <b>From 2007 onwards</b>                                                                                                                    | <b>1018</b> |

# BMJ Open

## Co-production of healthcare services with ethnic minority patients: protocol of a scoping review

|                                 |                                                                                                                                                                                                                                                                                                                                                                                                 |
|---------------------------------|-------------------------------------------------------------------------------------------------------------------------------------------------------------------------------------------------------------------------------------------------------------------------------------------------------------------------------------------------------------------------------------------------|
| Journal:                        | <i>BMJ Open</i>                                                                                                                                                                                                                                                                                                                                                                                 |
| Manuscript ID                   | bmjopen-2017-019519.R1                                                                                                                                                                                                                                                                                                                                                                          |
| Article Type:                   | Protocol                                                                                                                                                                                                                                                                                                                                                                                        |
| Date Submitted by the Author:   | 02-Nov-2017                                                                                                                                                                                                                                                                                                                                                                                     |
| Complete List of Authors:       | Radl-Karimi, Christina; Region Syddanmark, Center for Quality Nicolaisen, Anne; Region of Southern Denmark, Center for Quality Sodemann, Morten; Odense Universitetshospital, Migrant Health Clinic, Department of Infectious Diseases Q Batalden, Paul; The Dartmouth Institute, Geisel School of Medicine at Dartmouth von Plessen, Christian; Region of Southern Denmark, Center for Quality |
| <b>Primary Subject Heading</b>: | Health services research                                                                                                                                                                                                                                                                                                                                                                        |
| Secondary Subject Heading:      | Communication, Health services research, Patient-centred medicine                                                                                                                                                                                                                                                                                                                               |
| Keywords:                       | Co-production, Ethnic minorities, patient-provider relationship, cross-cultural communication, collaborative health                                                                                                                                                                                                                                                                             |
|                                 |                                                                                                                                                                                                                                                                                                                                                                                                 |

SCHOLARONE™  
Manuscripts

Peer Review Only

1  
2  
3  
4 **Title page**  
5  
6

7 **Title:**

8 Co-production of healthcare services with ethnic minority patients: protocol of a scoping review  
9

10  
11 **Authors:**

12 1. Corresponding author: Christina Radl-Karimi

13 Department: Center for Quality

14 Institution: Region of Southern Denmark

15 Adresse: P.V. Tuxensvej 3-5, 5500 Middelfart

16 DENMARK

17 E-mail: [crk@rsyd.dk](mailto:crk@rsyd.dk)

18 Phone: 0045 6348 4060  
19  
20

21  
22  
23  
24  
25 2. Anne Nicolaisen, Center for Quality, Region of Southern Denmark, Middelfart, Denmark

26 3. Morten Sodemann, Migrant Health Clinic, Department of Infectious Diseases Q, Odense  
27 University Hospital, Odense, Denmark

28 4. Paul Batalden, The Dartmouth Institute, Geisel School of Medicine at Dartmouth, Hanover, New  
29 Hampshire, USA

30 5. Christian von Plessen, Center for Quality, Region of Southern Denmark, Middelfart, Denmark  
31  
32  
33  
34  
35  
36  
37

38 Word count: 3372  
39  
40  
41  
42  
43  
44  
45  
46  
47  
48  
49  
50  
51  
52  
53  
54  
55  
56  
57  
58  
59  
60

## ABSTRACT

### Introduction

Ethnic minority patients often meet barriers to patient centred healthcare in their new host countries. Given the heterogeneity of patients from ethnic minorities, established strategies for patient centredness might not work in their case. The concept of co-production provides a new perspective on how to collaboratively create the highest possible value for both the patient and the healthcare system. The concept acknowledges that all services are co-produced and directs attention to the relationship between patient and care provider. Co-production is still a new concept in health care and its use with vulnerable groups of patients requires further study. This protocol outlines a scoping review to be conducted on the current knowledge on co-production of service by immigrants and their service providers in the medical healthcare sector.

### Methods and analysis

We will use Joanna Brigg's methodology for scoping reviews. The data will stem from the following databases: PubMed, Scopus, Ovid EMBASE, EBSCO CINAHL, EBSCO PsycINFO, Cochrane Library, and Web of Science. We will also screen the websites of national authorities and research organisations for publications and review the literature lists of the identified articles for relevant references. We will include all types of literature on co-production of healthcare or social services by ethnic minorities and service providers, including their relationship with one another, communication and collaboration. Two reviewers will independently screen eligible publications and extract data using a checklist developed for this scoping review.

### Ethics and dissemination

The results of the study will provide an innovative perspective on the co-production of value in healthcare services by patients from ethnic minorities and care providers. We will present the results at national and international conferences, seminars, and other events with relevant stakeholders and immigrant patients, and publish them in a peer reviewed journal.

**KEYWORDS:** Co-production, ethnic minorities, patient-provider relationship, cross-cultural communication, collaborative health

## STRENGTHS AND LIMITATIONS OF THIS STUDY

- The literature on co-production with ethnic minority citizens/patients has not been mapped previously. The review will provide valuable insights into the current knowledge on co-production of service between immigrants and their service providers in both the medical healthcare and the community service sectors.
- Our broad search strategy goes beyond the term “co-production,” capturing aspects of co-production in similar concepts of relationships between patients from ethnic minorities and providers, for example patient/community involvement and cross-cultural communication.
- We will pay special attention to factors fostering capability for co-production.
- The scoping review will be conducted in accordance with established guidelines. Two reviewers will independently screen the literature and read the full-text.
- The broad search strategy incurs the risk of a wide spectrum of disparate results, which can be challenging to overview.

## INTRODUCTION

Ethnic minorities often experience barriers when accessing healthcare services in primary and secondary medical facilities in their host country. These barriers, often caused by language and cultural differences, lack of social support, or challenges related to transportation or employment put them at risk for co-producing and receiving suboptimal care.<sup>1 2</sup> However, suboptimal care can also occur because of unintentional provider behaviour. Even care providers who are motivated to be non-prejudiced may stereotype ethnic minority patients because they struggle with the great diversity of the patient group.<sup>3-5</sup> Ethnic minority patients do not only differ from the main population; they are also a heterogeneous group themselves. They differ by ethnicity, culture, religion, and their reason for migration.<sup>6</sup> This complex mixture of cultures and backgrounds makes it even more challenging for them to develop and to be capable of co-producing a service, to fit in, and to have their health and welfare care needs met.<sup>7</sup>

Based on the growing belief that involving patients can improve the quality of care,<sup>8 9</sup> over the past decade healthcare systems have been infused with innovative strategies for shared decision-making, and patient centredness and participation.<sup>10 11</sup> These approaches might be beneficial for patients who actively participate in the medical consultation by expressing their concerns, asking questions,



1  
2  
3  
4 and stating their expectations. However, other patient groups (including, for instance, ethnic  
5 minority patients) are not only less inclined to take an active role in the consultation; they also may  
6 be less likely to have their involvement supported by the healthcare professional.<sup>12</sup> Thus, even  
7 within strategies of patient centredness, the patient still depends to a certain degree on the care  
8 provider,<sup>13</sup> which might limit their full effectiveness to improve patient outcomes.<sup>14</sup> It has been  
9 suggested that such predefined and standardised approaches to the provision of healthcare services  
10 resemble the logic for making a product, rather than a service. Therefore, this confusion may  
11 contribute to the slow progress of services that are truly patient centred.<sup>15</sup> This suggests that a fresh  
12 frame for exploring the relationship between patient and care provider may offer new insights into  
13 how healthcare services can create the best possible value contribution for the health of all patients,  
14 and especially marginalised groups such as ethnic minority patients.  
15  
16  
17  
18  
19  
20  
21  
22

### 23 **Co-production of healthcare services**

24 The concept of co-production, as a new perspective, has great potential to improve medical  
25 healthcare services. Originally established in the 1970s by political economist Elinor Ostrom,<sup>16</sup> co-  
26 production has only recently been introduced to healthcare but is quickly gaining momentum, both  
27 in practice and in research.<sup>15 17 18</sup> According to Batalden,<sup>19</sup> co-production in healthcare is “the  
28 interdependent work of patients (and relatives) and health care professionals to design, create,  
29 develop, deliver, assess, and improve relationships and actions that contribute to the health of  
30 individuals and populations.” Thus, the core of healthcare service provision lies in the individual  
31 relationship between patient and care provider - a relationship in which the co-producers both  
32 contribute resources and benefit from the value created by the service provided. The value created  
33 for patients comprises, for instance, their satisfaction with the service, the impact of the service  
34 upon their well-being and the extent to which it meets their social, health, or economic needs.  
35 Service co-production does also create “public value” by contributing to societal objectives or well-  
36 being.<sup>20</sup>  
37  
38  
39  
40  
41  
42  
43  
44  
45  
46

47 Based on Osborne’s conceptualisation of the topic,<sup>20</sup> our understanding of co-production comprises  
48 (1) the “pure” co-production, in which the user unavoidably co-produces the service experience and  
49 outcomes with a service provider; and (2) how the service experience integrates with the user’s  
50 overall life experience. In medical healthcare, this includes both the direct encounter between  
51 patient and care provider and how the experience of the co-produced service integrates with the  
52  
53  
54  
55  
56  
57  
58  
59  
60

1  
2  
3  
4 patient's overall life experience. This implies sharing values and interdependence between patient  
5 and professional. It involves letting patient and family priorities influence the civil discourse when  
6 planning the implementation of healthcare services.<sup>15</sup>  
7  
8  
9

10 Co-production is present in any encounter between patient and professional intent on developing  
11 and creating a service. The degree and form of co-production can vary across time, setting, and  
12 circumstance. In addition, patients and care providers have widely disparate co-production  
13 dispositions and capacities.<sup>15</sup> Despite the overall optimism around the concept, there are also critical  
14 voices emphasising that co-production can not only empower but also exploit patients. Constant  
15 cost-constraint pressures and a reluctance to release power are playing a role in the providers'  
16 inability to co-produce.<sup>21</sup> Moreover, service providers need to be able to facilitate and create  
17 relationships, be adaptable, and act as a link between citizen and system in order for co-production  
18 to happen.<sup>22 23</sup> Moreover, disadvantaged citizens (eg, ethnic minorities) may be constrained by a  
19 lack of knowledge or other resources necessary to contribute to and benefit from a co-production  
20 process. However, if co-production strategies are designed to lift the underlying constraints of  
21 disadvantaged service users (eg, lack of knowledge or resources), they may increase both efficiency  
22 and equity in the service delivery.<sup>24</sup>  
23  
24  
25  
26  
27  
28  
29  
30  
31  
32

33 In recent years, a multitude of co-production efforts between the public sector and the civil society  
34 via community based interventions have been established in Denmark.<sup>25-27</sup> Yet, there is still little  
35 experience with the concept in medical healthcare services. This calls for further investigations on  
36 co-production under varying conditions and testing whether the experiences collected from  
37 community based interventions can be transferred to the medical healthcare sector. The additional  
38 focus on ethnic minorities can render valuable insights on how to improve the quality of their care  
39 and eventually contribute to better health. To that end, this article outlines a protocol for a scoping  
40 review on the current knowledge on co-production of service between immigrants and their service  
41 providers in the medical healthcare and community sector.  
42  
43  
44  
45  
46  
47  
48

#### 49 **STUDY DESIGN AND METHODS**

50  
51 The scoping review methodology is particularly useful for systematically examining broad areas of  
52 evidence from disparate and heterogeneous sources and identifying key concepts, theories, evidence  
53 or research gaps.<sup>28 29</sup> Thus, the scoping review method fits our purpose of providing a broad  
54  
55  
56  
57  
58  
59  
60

1  
2  
3  
4 overview of the existing published and unpublished literature on co-production of services between  
5 ethnic minorities and service providers. Unlike systematic reviews, scoping reviews do not focus on  
6 the effectiveness of a specific intervention but are used to map key concepts of a certain research  
7 area or to clarify the conceptual boundaries of a topic. Moreover, a scoping review allows for  
8 ongoing reflections, potentially considering emerging evidence and ongoing adjustments to the  
9 search strategy. The scoping review will be conducted according to the methodology proposed by  
10 the Joanna Briggs Institute,<sup>30</sup> which is based on the five stage framework laid out by Arksey &  
11 O'Malley<sup>28</sup> and Levac et al.<sup>29</sup>

### 18 **Stage 1: Identifying the research question**

19 The following research questions will guide the development of the protocol, facilitate the literature  
20 search, and provide a structure for the scoping review report:

- 21 - What are the individual and context related factors influencing the co-production of value in  
22 healthcare between ethnic minority patients and their care providers?
- 23 - How do these individual and context related factors affect the co-production process  
24 between ethnic minority patients and their care providers?
- 25 - What learnings on co-production of value for ethnic minority citizens in the community  
26 sector may be applied to co-production in medical healthcare?

27  
28  
29  
30  
31  
32  
33  
34  
35  
36 Co-produced healthcare services by ethnic minorities and service providers can be influenced by a  
37 variety of individual and context related factors. Individual factors can influence the capability to  
38 co-produce and can relate to a member of the dyadic, interdependent relationship. Patient related  
39 factors include sociodemographic backgrounds, previous expectations of and experiences with the  
40 healthcare system or their capacities, and attitudes toward involvement. Care provider-related  
41 factors on the other side can for instance relate to the care providers' preparedness and their  
42 understanding of ethnic minority health needs, as well as their attitudes or behaviours towards the  
43 ethnic minority patient. Context related factors can be of either an objective or a subjective nature.<sup>31</sup>  
44 They can include tangible (objective) factors such as the organisation of an integrated healthcare  
45 system, clinical guidelines, or even the clinical surrounding. In contrast, the subjective context  
46 focuses on how patients and care providers interpret and attach significance to what is happening  
47 around them and how that influences their own behaviour and interaction with one another.

1  
2  
3  
4  
5 The literature search will cover two potential arenas of co-production: (1) between ethnic minority  
6 patients and care providers in the healthcare sector and (2) between ethnic minority citizens and  
7 social service providers in the community sector. In recent years, Denmark has seen an increasing  
8 interest in developing new ways of establishing collaborations between citizens and service  
9 providers in the production and delivery of welfare benefits.<sup>25</sup> In contrast to the medical healthcare  
10 sector, co-production in the community sector is usually of a voluntary nature.<sup>20</sup> However, we  
11 decided to include the community sector to investigate whether these findings can be applied within  
12 a healthcare context after all.  
13  
14  
15  
16  
17  
18  
19

## 20 **Stage 2: Identifying relevant studies**

21 Our preliminary search strategy was developed in consultation with a medical librarian at the  
22 University of Southern Denmark (see Appendix 1). Elements of co-production can also be found in  
23 other concepts such as patient/citizen involvement and participation, shared decision making, and  
24 patient/citizen centredness and empowerment. Therefore, these concepts will be included in the  
25 search strategy of literature from the health and social sciences, namely sociology, anthropology,  
26 and psychology.  
27  
28  
29  
30  
31  
32

### 33 Peer-reviewed literature

34 We will conduct a systematic search of peer reviewed literature using a three step search strategy in  
35 licensed journal databases, including all study designs and methodology. The first step is an initial  
36 limited search in the PubMed and Scopus databases relevant to the topic. This step has already been  
37 undertaken, on 16 August 2017, and yielded 1018 hits in the PubMed and 159 in the Scopus  
38 databases. In the second step, we will use all identified keywords and index terms from the initial  
39 search and translate them in Ovid EMBASE, EBSCO CINAHL, EBSCO PsycINFO, Cochrane  
40 Library, and Web of Science databases. In the third step, we will search the reference lists of the  
41 identified relevant articles for additional studies. Full text publications in English, Scandinavian  
42 languages (Danish, Swedish, and Norwegian), and German will be considered for inclusion,  
43 because the authors can read these languages. No geographic limits will be used for the peer  
44 reviewed literature search, since we expect the principal concept of co-production to be comparable  
45 across countries. The search will be restricted to publications from 2007 onwards when patient  
46  
47  
48  
49  
50  
51  
52  
53  
54  
55  
56  
57  
58  
59  
60

1  
2  
3  
4 centred care was beginning to take root and appear in medical literature.<sup>32</sup> We will use EndNote to  
5 remove duplicates and store bibliographic information.  
6

#### 7 Non-peer reviewed literature

8 We will also screen non peer-reviewed literature to identify non-indexed reports, government  
9 documents, guidelines, policy papers, and dissertations. We will search websites of Danish national  
10 authorities, research institutions and other relevant interest organisations. To gather comparable  
11 publications from another national setting – without moving beyond the feasible scope of this  
12 review – we will also search corresponding websites in the United Kingdom. This country was  
13 chosen because of its comprehensive experiences with the co-production concept in healthcare.<sup>33</sup>  
14  
15  
16  
17  
18

### 19 **Stage 3: Study selection**

20 The PCC (participant, concept, context) mnemonic suggested by the Joanna Briggs Institute<sup>30</sup>  
21 provides a transparent guide for reviewers and readers and will direct the decision process on which  
22 sources to include in the scoping review.  
23  
24  
25  
26  
27

#### 28 (P) Participants

29 In the scoping review we will focus on the co-productive relationship between ethnic minority  
30 patients/citizens and care/service providers. Therefore, both sides of this relationship will be  
31 included as participants. The search will include literature on ethnic minorities of any origin, age, or  
32 sex. We define ethnic minorities as a group within a community whose national or cultural  
33 traditions differ from those of the main population.<sup>34</sup> This includes immigrants, their descendants,  
34 and groups of people who were born in a certain country but still count as a minority (such as  
35 Hispanics, Native Americans, and Aborigines). Immigrants are defined as foreign born people who  
36 have moved to another country for the purpose of settlement.<sup>35</sup> This definition includes economic  
37 migrants, temporary foreign workers, foreign students, documented and undocumented migrants,  
38 refugees, and asylum seekers. Literature on descendants (ie, neither of their parents was born in the  
39 country they live in) will be included because they resemble first generation immigrants.<sup>36 37</sup> On the  
40 service provider side, we will include all types of health professionals and social service providers  
41 that are delivering personal services for ethnic minorities. This can include service providers from  
42 the public/state or the voluntary/non-profit sectors that work on social, health, or educational  
43 activities for ethnic minorities on a community level. Literature with researchers as participants on  
44  
45  
46  
47  
48  
49  
50  
51  
52  
53  
54  
55  
56  
57  
58  
59  
60

1  
2  
3  
4 the provider side will be accepted, if the participating ethnic minority target group has been co-  
5 producing participatory research instead of merely being consulted on a certain research topic.  
6  
7

### 8 9 (C) Concept

10 In this scoping review we will analyse co-production as it happens in the joint activity between  
11 ethnic minorities and their service providers. This can happen either through ongoing personal  
12 interaction in which both parties perform most of the task together (eg, in a patient – physician  
13 consultation) or through processes in which citizens act separately for most of the time and only  
14 deal with the service provider at particular points, when the gains of their efforts are combined (eg,  
15 in between consultation appointments).<sup>38</sup> This includes face-to-face encounters in consultations as  
16 well as group activities such as shared medical appointments, in which ethnic minorities co-produce  
17 strategies with their peers. Additionally, we will include publications on the relationship,  
18 communication, or collaboration between ethnic minorities and service providers because they are  
19 strongly related to the concept of co-production and might entail co-productive elements. We will  
20 use a broad definition of communication, including verbal or non-verbal behaviour, interaction, and  
21 interpersonal knowledge, skills, and habits. Publications on community based participatory research  
22 will be included if ethnic minorities (1) have been actively co-producing the research and (2)  
23 benefit from the value created by the research project. Framing the concept of co-production this  
24 way will allow us to include literature with an intention to co-produce service between ethnic  
25 minorities and service providers, as well as publications with an unexpected, but retrospectively  
26 recognised, co-produced outcome.  
27  
28  
29  
30  
31  
32  
33  
34  
35  
36  
37  
38  
39  
40

### 41 (C) Context

42 We will consider all settings for co-production by ethnic minorities and care/service providers in  
43 health and social care. Examples in primary healthcare are general practitioners, specialists,  
44 pharmacies, home care, nursing homes, and community nurses. In the secondary sector, public,  
45 private, somatic, and psychiatric hospitals will be included. All types of healthcare services  
46 available for patients in ambulatory care, day care, long term care and social care will also be  
47 included. We will also include community settings in which individual ethnic minority citizens or  
48 communities actively participate in delivering social services. The definition of social services used  
49 here is (1) they are *personal* services, rather than services related to the production of goods; (2)  
50  
51  
52  
53  
54  
55  
56  
57  
58  
59  
60

1  
2  
3  
4 they fulfill personal *social* rather than physical or intellectual needs; (3) they focus on *social roles*  
5 rather than bodies, intellects or minds, thus distinguishing them from health, education and  
6 psychological assistance; and (4) they are performed person to person in direct *social interactions*.<sup>39</sup>  
7  
8  
9

10 Two reviewers (RKC and NA) will screen titles and abstracts against the PCC criteria and mark  
11 them

12 “include,” “exclude,” “uncertain,” or “relevant for other purposes.” A summary of all inclusion and  
13 exclusion criteria in regard to form and content is shown in Table 1. To ensure reliability between  
14 the reviewers, the inclusion/exclusion criteria will be pilot tested on a random sample of citations. If  
15 no abstract can be identified, the publication will be dismissed. The reviewers will discuss  
16 uncertainties or differences. When in doubt, a third reviewer (vPC) will be consulted for the final  
17 decision. The same two reviewers will conduct the full text screening, which again will be pilot  
18 tested on a random sample of articles. No formal quality assessment will be performed.  
19  
20  
21  
22  
23  
24  
25

#### 26 **Stage 4: Charting the data**

27 One reviewer (RKC) will extract the data using a descriptive charting table designed for this review.  
28 The charting table will be pretested in collaboration with the second reviewer (NA) on a minimum  
29 of five articles to ensure consistency of data extraction. At this stage, the charting table may be  
30 further refined if necessary. The following key information will be extracted:  
31  
32  
33

- 34 • author(s)
  - 35 • year of publication
  - 36 • publication type (eg, original research, report)
  - 37 • study design
  - 38 • population characteristic (eg, patient, citizen, ethnicity, sex, age, morbidity)
  - 39 • provider characteristic (eg, profession)
  - 40 • concept described (eg, co-production, patient involvement)
  - 41 • context (eg, country, healthcare setting, community setting)
  - 42 • intervention (eg, goal setting)
  - 43 • key findings (eg, factors influencing the co-productive relationship between ethnic  
44 minorities and service providers.)
- 45  
46  
47  
48  
49  
50  
51  
52  
53

54 Table 1

## Inclusion/exclusion criteria

## Inclusion criteria are:

- **languages:** published in English, Danish, Swedish, Norwegian, or German languages
- **date:** published from 2007 and onwards
- **peer reviewed literature:** any study design and methodology
- **non peer reviewed literature:** reports, government documents, guidelines, policy papers, dissertations, and conference abstracts
- **population:** patients or citizens whose ethnicity and/or cultural traditions differ from those of the main population who co-produce services with healthcare/social providers or researchers
- **co-production as method:** publications focusing on the joint creation of value for the co-producers through, for instance, the development, implementation, or evaluation of interventions, self-management plans, services, tools, or knowledge
- **co-production as outcome:** publications that report on planned/unexpected co-produced outputs and outcomes, even if not initially planned
- the co-producers both contribute resources and benefit from the value created by the service provided
- publications that report on concrete improvement strategies for explicit collaboration or co-production between ethnic minorities and service providers
- **setting:** co-production in medical healthcare or community settings

## Exclusion criteria are:

- publications on how to involve and increase ethnic minority participation in research, trials, or screening interventions (unless they were directly involved in the development and design of these interventions and directly benefited from the value created through the research)
- publications focusing on co-production involving only more resourceful representatives of the ethnic minority target group
- publications focusing purely on consulting ethnic minorities or service providers on their perspectives and opinions
- publications focusing on the recruitment/education of voluntary community (health) workers
- publications focusing only on the consequences of suboptimal ethnic minority – provider relationships



- publications on co-production on organisation level (eg, between hospital departments, with private organizations)

### **Stage 5: Collating, summarising and reporting the results**

The scoping review will give an overview of a relatively broad field of literature, including a wide range of different publication types. Therefore, special attention will be paid to how the large amount of data will be presented. A guideline specifically for reporting scoping reviews is currently being developed by a group of researchers at the University of Toronto, but it has not yet been published.<sup>40</sup> We will make efforts to secure use of this new guidance, but failing its availability, we will use a modified version of the Preferred Reporting Items for Systematic Reviews and Meta-Analysis (PRISMA).<sup>41</sup> PRISMA items not appropriate for the purpose of this scoping review (eg, risk of bias) will be left out. The extracted data will be presented in tabular or diagrammatic form to give an overview of the amount, type, and distribution of included literature.

The plan for data presentation and discussion is based on the three research questions for this scoping review. We expect to outline individual and context-related factors that influence co-production processes between ethnic minorities and their service providers. In addition, we will analyse how the identified factors affect the respective co-production process. Despite the contextual and setting related differences between a community and a healthcare setting, we want to investigate whether the mechanisms behind co-production in a community setting can be used for learning and as a source of inspiration for the medical healthcare sector.

### **IMPLICATIONS**

Interest in understanding the needs of new and diverse groups of patients and creating health services that can meet these needs in an interdependent, patient centred way invites a new approach. “Co-production” may open up new perspectives and possibilities to improve the contribution of healthcare services to health. Findings of this study will provide an innovative perspective on the co-produced services by ethnic minority patients and care providers in Danish medical healthcare. This study represents the first step of a research programme designed to develop a model of co-

production of healthcare services with ethnic minority patients. Such a model will be based on principles that can be useful in designing and evaluating patient centred healthcare services for ethnic minority patient groups, not only in a Danish context but potentially in any setting where ethnic minority patients or other minority patient groups meet their care providers. A timeline for the entire scoping review process is presented in Table 2.

Table 2

Timeline for protocol and scoping review

|                  | 2017 |     |     |      |     |     |     | 2018 |     |
|------------------|------|-----|-----|------|-----|-----|-----|------|-----|
|                  | Jun  | Jul | Aug | Sept | Oct | Nov | Dec | Jan  | Feb |
| Writing protocol | ■    | ■   |     |      |     |     |     |      |     |
| Search           |      | ■   | ■   | ■    |     |     |     |      |     |
| Screening        |      |     |     | ■    | ■   |     |     |      |     |
| Analysis         |      |     |     |      | ■   | ■   | ■   |      |     |
| Reporting        |      |     |     |      |     |     | ■   | ■    | ■   |

## ETHICS AND DISSEMINATION

This scoping review will include exclusively secondary data, gathered through searching the literature in electronic databases and other online sources. Thus, no ethics committee approval is required for this study. The protocol will support a systematic and transparent process of preparing and conducting the entire review process. The results will be disseminated through presentations at national and international clinical conferences, and in relevant seminars and networks on co-production and/or immigrant health to relevant stakeholders and immigrant patient groups, and will be published in a peer reviewed journal.

**Acknowledgements:** The authors thank information specialist Line Bruun Hansen from the University Library at University of Southern Denmark, campus Esbjerg and librarian Berit Alving from the Videncentret at Odense University Hospital for their expertise provided in guiding the design of the draft search strategy for this scoping review.

1  
2  
3  
4 **Contributors:** RKC drafted the protocol. NA, BP and SM helped conceptualize the research, and  
5 reviewed and edited the protocol. vPC obtained funding, conceptualized the research and reviewed  
6 and edited the protocol.  
7  
8  
9

10 **Competing interest:** None  
11  
12

13  
14 **Data sharing:** No additional data available  
15

16  
17 **Funding statement:** This study is financed by the Center for Quality in the Region of Southern  
18 Denmark and the Department of Regional Health Research at the University of Southern Denmark.  
19  
20

21  
22 **Ethics approval:** The scoping review will undertake an analysis of secondary data and does not  
23 require ethical approval.  
24  
25

26  
27 **Twitter:** Follow Christina Radl-Karimi at @ChristinaM\_RK  
28  
29  
30  
31  
32  
33  
34  
35  
36  
37  
38  
39  
40  
41  
42  
43  
44  
45  
46  
47  
48  
49  
50  
51  
52  
53  
54  
55  
56  
57  
58  
59  
60

**REFERENCES**

1. Woodgate RL, Busolo DS, Crockett M, et al. A qualitative study on African immigrant and refugee families' experiences of accessing primary health care services in Manitoba, Canada: it's not easy! *International journal for equity in health* 2017;16
2. Suurmond J, Uiters E, de Bruijne MC, et al. Negative health care experiences of immigrant patients: a qualitative study. *BMC health services research* 2011;11(1):10.
3. Ahmed S, See S, Shommu N, et al. Experiences of communication barriers between physicians and immigrant patients: A systematic review and thematic synthesis. *Patient Experience Journal* 2017;4(1):122-40.
4. Burgess DJ, Fu SS, van Ryn M. Why Do Providers Contribute to Disparities and What Can Be Done About It? *Journal of general internal medicine* 2004;19(11):1154-9.
5. Sodemann M, Kristensen TR, Sangren H, et al. [Barriers to communication between clinicians and immigrants]. *Ugeskr Laeger* 2015;177(35)
6. Derosé KP, Escarce JJ, Lurie N. Immigrants and health care: sources of vulnerability. *Health affairs (Project Hope)* 2007;26(5):1258-68.
7. Fiscella K, Epstein RM. So much to do, so little time: Care for the socially disadvantaged and the 15-minute visit *Archives of internal medicine* 2008;168(17):1843-52.
8. Coulter A, Ellins J. Patient-focused interventions: A review of the evidence. London, UK: The Health Foundation, 2006.
9. Wagner EH, Austin BT, Davis C, et al. Improving chronic illness care: translating evidence into action. *Health affairs (Project Hope)* 2001;20(6):64-78.
10. Ministry of Health. Nationalt Kvalitetsprogram for Sundhedsområdet 2015-2018. Copenhagen, DK, 2015.
11. Saha S, Beach MC, Cooper LA. Patient Centeredness, Cultural Competence and Healthcare Quality. *Journal of the National Medical Association* 2008;100(11):1275-85.
12. Street RL, Gordon HS, Michael MW, et al. Patient Participation in Medical Consultations: Why Some Patients Are More Involved Than Others. *Medical Care* 2005;43(10):960-69.
13. Millenson ML. When "patient centred" is no longer enough: the challenge of collaborative health: an essay by Michael L Millenson. *BMJ (Clinical research ed)* 2017;358
14. Shay LA. Where is the evidence? A systematic review of shared decision making. 2015;35(1):114-31.
15. Batalden M, Batalden P, Margolis P, et al. Coproduction of healthcare service. *BMJ quality & safety* 2015
16. Ostrom E. Crossing the great divide: Coproduction, synergy, and development. *World Development* 1996;24(6):1073-87.

17. Palumbo R. Contextualizing co-production of health care: a systematic literature review. *International Journal of Public Sector Management* 2015;29(1):72-90.
18. Voorberg WH, Bekkers VJJM, Tummers LG. A Systematic Review of Co-Creation and Co-Production: Embarking on the social innovation journey. *Public Management Review* 2015;17(9):1333-57.
19. Batalden P. A reflection on "Coproduct of healthcare service" (September 2017): The Dartmouth Institute, 2017.
20. Osborne SP, Radnor Z, Strokosch K. Co-Production and the Co-Creation of Value in Public Services: A suitable case for treatment? *Public Management Review* 2016;18(5):639-53.
21. Essén A, Värlander SW, Liljedal KT. Co-production in chronic care: exploitation and empowerment. *European Journal of Marketing* 2016;50(5/6):724-51.
22. Poulsen L. Embedsmandsrollen i borgerdrevet samskabelse - En ny kommunal embedsmandsrolle [The role of public officials in citizen-driven partnership]. Roskilde University, 2017.
23. Færch C. Borgerdrevet samskabelse i kommunerne - Embedsmændenes nye rolle [Citizen-driven co-production in municipalities]. Roskilde University, 2017.
24. Jakobsen M, Andersen SC. Coproduction and Equity in Public Service Delivery. *Public Adm Rev* 2013;73(5):704-13.
25. Andersen LL, Espersen HH. Partnerskaber og samarbejder mellem det offentlige og civilsamfundet. [Partnerships and cooperation between the public sector and the civil society]. Copenhagen: Socialstyrelsen [The National Board of Social Services], 2017.
26. Tortzen A. Samskabelse i kommunale rammer - hvordan kan ledelse understøtte samskabelse [Coproduction in the municipal sector]. Roskilde University, DK, 2016.
27. Turnaas S. The Professional Side of Co-Production. University of Tampere, 2016.
28. Arksey H, O'Malley L. Scoping studies: towards a methodological framework. *International Journal of Social Research Methodology* 2005;8(1):19-32.
29. Levac D, Colquhoun H, O'Brien KK. Scoping studies: advancing the methodology. *Implementation Science* 2010;5(1):69.
30. Peters MDJ, Godfrey CM, McInerney P, et al. The Joanna Briggs Institute Reviewers' Manual 2015: Methodology for JBI Scoping Reviews. Adelaide, AUS: The Joanna Briggs Institute, 2015.
31. Bate P. Context is everything. In *Perspectives on Context*. London: The Health Foundation, 2014:1-29.
32. Laine C, Davidoff F. Patient-centered medicine: A professional evolution. *Jama* 1996;275(2):152-56.

- 1  
2  
3  
4 33. Loeffler E, Power G, Bovaird T, et al. Co-production of health and wellbeing in Scotland. Birmingham, UK: Governance International, 2013.
- 5  
6  
7 34. Oxford Dictionaries. Definition of "ethnic minority" in English: Oxford University Press;  
8 [Available from: [https://en.oxforddictionaries.com/definition/ethnic\\_minority](https://en.oxforddictionaries.com/definition/ethnic_minority) accessed October 24,  
9 2017.
- 10  
11 35. Perruchoud R, Redpath-Cross J. Glossary on Migration. Book Glossary on Migration. Geneva:  
12 International Organisation for Migration (IOM), 2011.
- 13  
14 36. Esholdt H, Fuglsang M. Etniske forskelle i patienters oplevelser [Ethnic differences in patient  
15 experiences]. Region Hovedstaden: Enheden for Brugerundersøgelser, 2009.
- 16  
17 37. Jervelund SS, Malik S, Ahlmark N, et al. Morbidity, Self-Perceived Health and Mortality  
18 Among non-Western Immigrants and Their Descendants in Denmark in a Life Phase Perspective. *J*  
19 *Immigr Minor Health* 2017;19(2):448-76.
- 20  
21 38. Alford J. Engaging public sector clients: from service-delivery to co-production. New York:  
22 Palgrave Macmillan 2009.
- 23  
24 39. Bahle T. The changing institutionalization of social services in England and Wales, France and  
25 Germany: is the welfare state on the retreat? *Journal of European Social Policy* 2003;13(1):5-20.
- 26  
27 40. Colquhoun HL, Levac D, O'Brien KK, et al. Scoping reviews: time for clarity in definition,  
28 methods, and reporting. *Journal of Clinical Epidemiology* 2014;67(12):1291-94.
- 29  
30 41. Moher D, Liberati A, Tetzlaff J, et al. Preferred reporting items for systematic reviews and  
31 meta-analyses: the PRISMA statement. *PLoS medicine* 2009;6(7):e1000097.
- 32  
33  
34  
35  
36  
37  
38  
39  
40  
41  
42  
43  
44  
45  
46  
47  
48  
49  
50  
51  
52  
53  
54  
55  
56  
57  
58  
59  
60

1  
2  
3  
4  
5  
6  
7  
8  
9  
10  
11  
12  
13  
14  
15  
16  
17  
18  
19  
20  
21  
22  
23  
24  
25  
26  
27  
28  
29  
30  
31  
32  
33  
34  
35  
36  
37  
38  
39  
40  
41  
42  
43  
44  
45  
46  
47  
48  
49  
50  
51  
52  
53  
54  
55  
56  
57  
58  
59  
60

## Appendix 1 – Search strategy in PubMed, August 16th 2017

|    | Search terms                                                                                                                                                                                                                                                                             | Results |
|----|------------------------------------------------------------------------------------------------------------------------------------------------------------------------------------------------------------------------------------------------------------------------------------------|---------|
| 1  | Coproduction OR co-production OR coproduce OR co-produce OR coproducing OR co-producing                                                                                                                                                                                                  | 1474    |
| 2  | Cocreation OR co-creation OR cocreate OR co-create OR cocreating OR co-creating                                                                                                                                                                                                          | 320     |
| 3  | Codesign OR co-design OR codesigning OR co-designing                                                                                                                                                                                                                                     | 246     |
| 4  | Cooperation OR co-operation OR cooperate OR co-operate OR cooperating OR co-operating                                                                                                                                                                                                    | 62062   |
| 5  | Collaboration OR collaborate OR collaborating                                                                                                                                                                                                                                            | 64249   |
| 6  | Co-care                                                                                                                                                                                                                                                                                  | 10      |
| 7  | “public participation” OR “public involvement” OR “public empowerment” OR “public activation”                                                                                                                                                                                            | 1239    |
| 8  | “community participation” OR “community involvement” OR “community empowerment” OR “community activation”                                                                                                                                                                                | 4504    |
| 9  | “patient participation” OR “patient involvement” OR “patient empowerment” OR “patient activation”                                                                                                                                                                                        | 4864    |
| 10 | “Relationship-centered care” OR “relationship-centred care”                                                                                                                                                                                                                              | 139     |
| 11 | “patient-centered care” OR “patient-centred care” OR “patient-focused care”                                                                                                                                                                                                              | 4758    |
| 12 | “patient-centered nursing” OR “patient-centred nursing”                                                                                                                                                                                                                                  | 74      |
| 13 | “patient-centered communication” OR “patient-centred communication”                                                                                                                                                                                                                      | 455     |
| 14 | Patient-centeredness OR patient-centredness                                                                                                                                                                                                                                              | 1032    |
| 15 | “shared decision-making”                                                                                                                                                                                                                                                                 | 4731    |
| 16 | “cross-cultural communication”                                                                                                                                                                                                                                                           | 164     |
| 17 | “patient-provider relation” OR “patient-provider relations” OR “patient-provider relationship” OR “patient-provider relationships” OR “patient-provider communication” OR “patient-provider communications” OR “patient-provider interaction” OR “patient-provider interactions”         | 1578    |
| 18 | “patient-physician relation” OR “patient-physician relations” OR “patient-physician relationship” OR “patient-physician relationships” OR “patient-physician communication” OR “patient-physician communications” OR “patient-physician interaction” OR “patient-physician interactions” | 2007    |
| 19 | “patient-doctor relation” OR “patient-doctor relations” OR “patient-doctor relationship” OR “patient-doctor relationships” OR “patient-doctor communication” OR “patient-doctor communications” OR “patient-doctor interaction” OR “patient-doctor interactions”                         | 743     |
| 20 | “patient-nurse relation” OR “patient-nurse relations” OR “patient-nurse relationship” OR “patient-nurse relationships” OR “patient-nurse communication” OR “patient-nurse communications” OR “patient-nurse interaction” OR “patient-nurse interactions”                                 | 148     |
| 21 | “patient-hospital relation” OR “patient-hospital relations” OR “patient-hospital relationship” OR “patient-hospital relationships” OR “patient-hospital communication” OR “patient-hospital communications” OR “patient-hospital interaction” OR “patient-hospital interactions”         | 9       |
| 22 | (((((“Patient Participation”[Mesh]) OR “Community Participation”[Mesh]) OR “Patient-Centered Care”[Mesh]) OR “Decision Making”[Mesh]) OR                                                                                                                                                 | 268936  |

|    |                                                                                                                                             |             |
|----|---------------------------------------------------------------------------------------------------------------------------------------------|-------------|
|    | "Hospital-Patient Relations"[Mesh]) OR "Physician-Patient Relations"[Mesh]                                                                  |             |
| 23 | Or/1-22                                                                                                                                     | 402703      |
| 24 | Migrant OR migrants                                                                                                                         | 15667       |
| 25 | Immigrant OR immigrants                                                                                                                     | 21054       |
| 26 | "ethnic minority" OR "ethnic minorities" OR "ethnic minority group" OR "ethnic minority groups"                                             | 8571        |
| 27 | Refugee OR refugees                                                                                                                         | 8095        |
| 28 | "asylum seeker" OR "asylum seekers"                                                                                                         | 1075        |
| 29 | Descendant OR descendants                                                                                                                   | 4736        |
| 30 | "undocumented immigrant" OR "undocumented immigrants" OR "illegal immigrant" OR "illegal immigrants"                                        | 448         |
| 31 | ((("Emigrants and Immigrants"[Mesh]) OR "Transients and Migrants"[Mesh]) OR "Refugees"[Mesh]) OR "Undocumented Immigrants"[Mesh]            | 25136       |
| 32 | OR/24-31                                                                                                                                    | 60882       |
| 33 | "healthcare service" OR "healthcare services" OR "health care service" OR "health care services"                                            | 18690       |
| 34 | "social service" OR "social services"                                                                                                       | 9253        |
| 35 | "community service" OR "community services"                                                                                                 | 3558        |
| 36 | "community welfare"                                                                                                                         | 69          |
| 37 | "social welfare"                                                                                                                            | 3692        |
| 38 | "delivery of healthcare" OR "delivery of health care"                                                                                       | 11032       |
| 39 | "Integrated delivery of healthcare" OR "Integrated delivery of health care"                                                                 | 15          |
| 40 | ((("Health Services"[Mesh]) OR ("Delivery of Health Care"[Mesh] OR "Delivery of Health Care, Integrated"[Mesh])) OR "Social Welfare"[Mesh]) | 2412683     |
| 41 | OR/33-37                                                                                                                                    | 2425575     |
| 42 | 23 AND 32 AND 38                                                                                                                            | 1725        |
| 43 | 23 AND 32 AND 38 only: English, Swedish, Norwegian, Danish, German                                                                          | 1640        |
| 44 | <b>From 2007 onwards</b>                                                                                                                    | <b>1018</b> |



# BMJ Open

## Co-production of healthcare services with immigrant patients: protocol of a scoping review

|                                 |                                                                                                                                                                                                                                                                                                                                                                                                 |
|---------------------------------|-------------------------------------------------------------------------------------------------------------------------------------------------------------------------------------------------------------------------------------------------------------------------------------------------------------------------------------------------------------------------------------------------|
| Journal:                        | <i>BMJ Open</i>                                                                                                                                                                                                                                                                                                                                                                                 |
| Manuscript ID                   | bmjopen-2017-019519.R2                                                                                                                                                                                                                                                                                                                                                                          |
| Article Type:                   | Protocol                                                                                                                                                                                                                                                                                                                                                                                        |
| Date Submitted by the Author:   | 11-Dec-2017                                                                                                                                                                                                                                                                                                                                                                                     |
| Complete List of Authors:       | Radl-Karimi, Christina; Region Syddanmark, Center for Quality Nicolaisen, Anne; Region of Southern Denmark, Center for Quality Sodemann, Morten; Odense Universitetshospital, Migrant Health Clinic, Department of Infectious Diseases Q Batalden, Paul; The Dartmouth Institute, Geisel School of Medicine at Dartmouth von Plessen, Christian; Region of Southern Denmark, Center for Quality |
| <b>Primary Subject Heading</b>: | Health services research                                                                                                                                                                                                                                                                                                                                                                        |
| Secondary Subject Heading:      | Communication, Health services research, Patient-centred medicine                                                                                                                                                                                                                                                                                                                               |
| Keywords:                       | Co-production, immigrants, patient-provider relationship, cross-cultural communication, collaborative health                                                                                                                                                                                                                                                                                    |
|                                 |                                                                                                                                                                                                                                                                                                                                                                                                 |

SCHOLARONE™  
Manuscripts

Peer Review Only

**Title page****Title:**

Co-production of healthcare services with immigrant patients: protocol of a scoping review

**Authors:**

1. Corresponding author: Christina Radl-Karimi

Department: Center for Quality

Institution: Region of Southern Denmark

Adresse: P.V. Tuxensvej 3-5, 5500 Middelfart

DENMARK

E-mail: [crk@rsyd.dk](mailto:crk@rsyd.dk)

Phone: 0045 6348 4060

2. Anne Nicolaisen, Center for Quality, Region of Southern Denmark, Middelfart, Denmark

3. Morten Sodemann, Migrant Health Clinic, Department of Infectious Diseases Q, Odense University Hospital, Odense, Denmark

4. Paul Batalden, The Dartmouth Institute, Geisel School of Medicine at Dartmouth, Hanover, New Hampshire, USA

5. Christian von Plessen, Center for Quality, Region of Southern Denmark, Middelfart, Denmark

Word count: 3352

## ABSTRACT

### Introduction

Immigrant patients often meet barriers to patient centred healthcare in their new host countries. Given the heterogeneity of patients from ethnic minorities, established strategies for patient centredness might not work in their case. The concept of co-production provides a new perspective on how to collaboratively create the highest possible value for both the patient and the healthcare system. The concept acknowledges that all services are co-produced and directs attention to the relationship between patient and care provider. Co-production is still a new concept in health care and its use with vulnerable groups of patients requires further study. This protocol outlines a scoping review to be conducted on the current knowledge on co-production of service by immigrants and their service providers in the healthcare sector.

### Methods and analysis

We will use Joanna Brigg's methodology for scoping reviews. The data will stem from the following databases: PubMed, Scopus, Ovid EMBASE, EBSCO CINAHL, EBSCO PsycINFO, Cochrane Library, and Web of Science. We will also screen the websites of national authorities and research organisations for publications and review the literature lists of the identified articles for relevant references. We will include all types of literature on co-production of healthcare or social services by immigrants and service providers, including their relationship with one another, communication and collaboration. Two reviewers will independently screen eligible publications and extract data using a checklist developed for this scoping review.

### Ethics and dissemination

The results of the study will provide an innovative perspective on the co-production of value in healthcare services by immigrant patients and care providers. We will present the results at national and international conferences, seminars, and other events with relevant stakeholders and immigrant patients, and publish them in a peer reviewed journal.

**KEYWORDS:** Co-production, immigrants, patient-provider relationship, cross-cultural communication, collaborative health

## STRENGTHS AND LIMITATIONS OF THIS STUDY

- The literature on co-production with immigrant citizens/patients has not been mapped previously. The review will provide valuable insights into the current knowledge on co-production of service between immigrants and their service providers in both the healthcare and the social/community service sectors.
- Our broad search strategy goes beyond the term “co-production,” capturing aspects of co-production in similar concepts of relationships between patients from ethnic minorities and providers, for example patient/community involvement and cross-cultural communication.
- We will pay special attention to factors fostering capability for co-production.
- The scoping review will be conducted in accordance with established guidelines. Two reviewers will independently screen the literature and read the full-text.
- The broad search strategy incurs the risk of a wide spectrum of disparate results, which can be challenging to overview.

## INTRODUCTION

Immigrants often experience barriers when accessing healthcare services in primary and secondary medical facilities in their host country. These barriers, often caused by language and cultural differences, lack of social support, or challenges related to transportation or employment put them at risk for co-producing and receiving suboptimal care.<sup>1 2</sup> However, suboptimal care can also occur because of unintentional provider behaviour. Even care providers who are motivated to be non-prejudiced may stereotype immigrant patients because they struggle with the great diversity of the patient group.<sup>3-5</sup> Immigrant patients do not only differ from the main population; they are also a heterogeneous group themselves. They differ by ethnicity, culture, religion, and their reason for migration.<sup>6</sup> This complex mixture of cultures and backgrounds makes it even more challenging for them to develop and to be capable of co-producing a service, to fit in, and to have their health and welfare care needs met.<sup>7</sup>

Based on the growing belief that involving patients can improve the quality of care,<sup>8 9</sup> over the past decade healthcare systems have been infused with innovative strategies for shared decision-making, and patient centredness and participation.<sup>10 11</sup> These approaches might be beneficial for patients who actively participate in the medical consultation by expressing their concerns, asking questions,

1  
2  
3  
4 and stating their expectations. However, other patient groups (including, for instance, immigrant  
5 patients) are not only less inclined to take an active role in the consultation; they also may be less  
6 likely to have their involvement supported by the healthcare professional.<sup>12</sup> Thus, even within  
7 strategies of patient centredness, the patient still depends to a certain degree on the care provider,<sup>13</sup>  
8 which might limit their full effectiveness to improve patient outcomes.<sup>14</sup> It has been suggested that  
9 such predefined and standardised approaches to the provision of healthcare services resemble the  
10 logic for making a product, rather than a service. Therefore, this confusion may contribute to the  
11 slow progress of services that are truly patient centred.<sup>15</sup> This suggests that a fresh frame for  
12 exploring the relationship between patient and care provider may offer new insights into how  
13 healthcare services can create the best possible value contribution for the health of all patients, and  
14 especially marginalised groups such as immigrant patients.  
15  
16  
17  
18  
19  
20  
21  
22

### 23 **Co-production of healthcare services**

24 The concept of co-production, as a new perspective, has great potential to improve healthcare  
25 service delivery. Originally established in the 1970s by political economist Elinor Ostrom,<sup>16</sup> co-  
26 production has only recently been introduced to healthcare but is quickly gaining momentum, both  
27 in practice and in research.<sup>15 17 18</sup> According to Batalden,<sup>19</sup> co-production in healthcare is “the  
28 interdependent work of patients (and relatives) and health care professionals to design, create,  
29 develop, deliver, assess, and improve relationships and actions that contribute to the health of  
30 individuals and populations.” Thus, the core of healthcare service provision lies in the individual  
31 relationship between patient and care provider - a relationship in which the co-producers both  
32 contribute resources and benefit from the value created by the service provided. The value created  
33 for patients comprises, for instance, their satisfaction with the service, the impact of the service  
34 upon their well-being and the extent to which it meets their social, health, or economic needs.  
35 Service co-production does also create “public value” by contributing to societal objectives or well-  
36 being.<sup>20</sup>  
37  
38  
39  
40  
41  
42  
43  
44  
45  
46

47 Based on Osborne’s conceptualisation of the topic,<sup>20</sup> our understanding of co-production comprises  
48 (1) the “pure” co-production, in which the user unavoidably co-produces the service experience and  
49 outcomes with a service provider; and (2) how the service experience integrates with the user’s  
50 overall life experience. In healthcare, this includes both the direct encounter between patient and  
51 care provider and how the experience of the co-produced service integrates with the patient’s  
52  
53  
54  
55  
56  
57  
58  
59  
60

1  
2  
3  
4 overall life experience. This implies sharing values and interdependence between patient and  
5 professional. It involves letting patient and family priorities influence the civil discourse when  
6 planning the implementation of healthcare services.<sup>15</sup>  
7  
8  
9

10 Co-production is present in any encounter between patient and professional intent on developing  
11 and creating a service. The degree and form of co-production can vary across time, setting, and  
12 circumstance. In addition, patients and care providers have widely disparate co-production  
13 dispositions and capacities.<sup>15</sup> Despite the overall optimism around the concept, there are also critical  
14 voices emphasising that co-production can not only empower but also exploit patients. Constant  
15 cost-constraint pressures and a reluctance to release power are playing a role in the providers'  
16 inability to co-produce.<sup>21</sup> Moreover, service providers need to be able to facilitate and create  
17 relationships, be adaptable, and act as a link between citizen and system in order for co-production  
18 to happen.<sup>22 23</sup> Moreover, disadvantaged citizens (eg, immigrants) may be constrained by a lack of  
19 knowledge or other resources necessary to contribute to and benefit from a co-production process.  
20 However, if co-production strategies are designed to lift the underlying constraints of disadvantaged  
21 service users (eg, lack of knowledge or resources), they may increase both efficiency and equity in  
22 the service delivery.<sup>24</sup>  
23  
24  
25  
26  
27  
28  
29  
30  
31  
32

33 In recent years, a multitude of co-production efforts between the public sector and the civil society  
34 via community based interventions have been established in Denmark.<sup>25-27</sup> Yet, there is still little  
35 experience with the concept in healthcare services. This calls for further investigations on co-  
36 production under varying conditions and testing whether the experiences collected from community  
37 based interventions can be transferred to the healthcare sector. The additional focus on immigrants  
38 can render valuable insights on how to improve the quality of their care and eventually contribute to  
39 better health. To that end, this article outlines a protocol for a scoping review on the current  
40 knowledge on co-production of service between immigrants and their service providers in the  
41 healthcare and social/community sector.  
42  
43  
44  
45  
46  
47  
48

#### 49 **STUDY DESIGN AND METHODS**

50  
51 The scoping review methodology is particularly useful for systematically examining broad areas of  
52 evidence from disparate and heterogeneous sources and identifying key concepts, theories, evidence  
53 or research gaps.<sup>28 29</sup> Thus, the scoping review method fits our purpose of providing a broad  
54  
55  
56  
57  
58  
59  
60

1  
2  
3  
4 overview of the existing published and unpublished literature on co-production of services between  
5 immigrants and service providers. Unlike systematic reviews, scoping reviews do not focus on the  
6 effectiveness of a specific intervention but are used to map key concepts of a certain research area  
7 or to clarify the conceptual boundaries of a topic. Moreover, a scoping review allows for ongoing  
8 reflections, potentially considering emerging evidence and ongoing adjustments to the search  
9 strategy. The scoping review will be conducted according to the methodology proposed by the  
10 Joanna Briggs Institute,<sup>30</sup> which is based on the five stage framework laid out by Arksey &  
11 O'Malley<sup>28</sup> and Levac et al.<sup>29</sup>  
12  
13  
14  
15  
16  
17

### 18 **Stage 1: Identifying the research question**

19  
20 The following research questions will guide the development of the protocol, facilitate the literature  
21 search, and provide a structure for the scoping review report:  
22  
23

- 24 - What are the individual and context related factors influencing the co-production of value in  
25 healthcare between immigrant patients and their care providers?
- 26 - How do these individual and context related factors affect the co-production process  
27 between immigrant patients and their care providers?
- 28 - What learnings on co-production of value for immigrant citizens in the community sector  
29 may be applied to co-production in healthcare?  
30  
31  
32  
33  
34  
35

36 Co-produced healthcare services by immigrants and service providers can be influenced by a  
37 variety of individual and context related factors. Individual factors can influence the capability to  
38 co-produce and can relate to a member of the dyadic, interdependent relationship. Patient related  
39 factors include sociodemographic backgrounds, previous expectations of and experiences with the  
40 healthcare system or their capacities, and attitudes toward involvement. Care provider-related  
41 factors on the other side can for instance relate to the care providers' preparedness and their  
42 understanding of immigrant health needs, as well as their attitudes or behaviours towards the  
43 immigrant patient. Context related factors can be of either an objective or a subjective nature.<sup>31</sup>  
44 They can include tangible (objective) factors such as the organisation of an integrated healthcare  
45 system, clinical guidelines, or even the clinical surrounding. In contrast, the subjective context  
46 focuses on how patients and care providers interpret and attach significance to what is happening  
47 around them and how that influences their own behaviour and interaction with one another.  
48  
49  
50  
51  
52  
53  
54  
55  
56  
57  
58  
59  
60

1  
2  
3  
4 The literature search will cover two potential arenas of co-production: (1) between immigrant  
5 patients and care providers in the healthcare sector and (2) between immigrant citizens and social  
6 service providers in the community sector. In recent years, Denmark has seen an increasing interest  
7 in developing new ways of establishing collaborations between citizens and service providers in the  
8 production and delivery of welfare benefits.<sup>25</sup> In healthcare, co-production is usually of a  
9 involuntary nature because patients have to co-produce if they want better health. On the  
10 community level, co-production is more of a conscious and voluntary act and is for instance  
11 concerned with how to empower citizens or improve overall service delivery.<sup>20</sup> However, we  
12 decided to include the community sector to investigate whether we can learn from co-production  
13 experiences and see if these findings can be applied within a healthcare context.  
14  
15  
16  
17  
18  
19  
20  
21

## 22 **Stage 2: Identifying relevant studies**

23 Our preliminary search strategy was developed in consultation with a medical librarian at the  
24 University of Southern Denmark (see Appendix 1). Elements of co-production can also be found in  
25 other concepts such as patient/citizen involvement and participation, shared decision making, and  
26 patient/citizen centredness and empowerment. Therefore, these concepts will be included in the  
27 search strategy of literature from the health and social sciences, namely sociology, anthropology,  
28 and psychology.  
29  
30  
31  
32  
33

### 34 Peer-reviewed literature

35 We will conduct a systematic search of peer reviewed literature using a three step search strategy in  
36 licensed journal databases, including all study designs and methodology. The first step is an initial  
37 limited search in the PubMed and Scopus databases relevant to the topic. This step has already been  
38 undertaken, on 16 August 2017, and yielded 1018 hits in the PubMed and 159 in the Scopus  
39 databases. In the second step, we will use all identified keywords and index terms from the initial  
40 search and translate them in Ovid EMBASE, EBSCO CINAHL, EBSCO PsycINFO, Cochrane  
41 Library, and Web of Science databases. In the third step, we will search the reference lists of the  
42 identified relevant articles for additional studies. Full text publications in English, Scandinavian  
43 languages (Danish, Swedish, and Norwegian), and German will be considered for inclusion,  
44 because the authors can read these languages. No geographic limits will be used for the peer  
45 reviewed literature search, since we expect the principal concept of co-production to be comparable  
46 across countries. The search will be restricted to publications from 2007 onwards when patient  
47  
48  
49  
50  
51  
52  
53  
54  
55  
56  
57  
58  
59  
60



1  
2  
3  
4 centred care was beginning to take root and appear in medical literature.<sup>32</sup> We will use EndNote to  
5 remove duplicates and store bibliographic information.  
6  
7

#### 8 9 Non-peer reviewed literature

10 We will also screen non peer-reviewed literature to identify non-indexed reports, government  
11 documents, guidelines, policy papers, and dissertations. We will search websites of Danish national  
12 authorities, research institutions and other relevant interest organisations. To gather comparable  
13 publications from another national setting – without moving beyond the feasible scope of this  
14 review – we will also search corresponding websites in the United Kingdom. This country was  
15 chosen because of its comprehensive experiences with the co-production concept in healthcare.<sup>33</sup>  
16  
17  
18  
19  
20

#### 21 22 **Stage 3: Study selection**

23 The PCC (participant, concept, context) mnemonic suggested by the Joanna Briggs Institute<sup>30</sup>  
24 provides a transparent guide for reviewers and readers and will direct the decision process on which  
25 sources to include in the scoping review.  
26  
27  
28

#### 29 30 (P) Participants

31 In the scoping review we will focus on the co-productive relationship between immigrant  
32 patients/citizens and care/service providers. Therefore, both sides of this relationship will be  
33 included as participants. The search will include literature on immigrants of any origin, age, or sex.  
34 Immigrants are defined as foreign born people who have moved to another country for the purpose  
35 of settlement.<sup>34</sup> This definition includes economic migrants, temporary foreign workers, foreign  
36 students, documented and undocumented migrants, refugees, and asylum seekers. We will also  
37 include literature on descendants (ie, neither of the parents was born in the country they live in)  
38 because they tend to resemble first generation immigrants when it comes to morbidity and self-  
39 perceived health.<sup>35 36</sup> To get a more inclusive view of the evidence on the patient/citizen target  
40 group, we decided also to include ethnic minorities in the search. Searching only for immigrants  
41 might result in too narrow findings and useful insights relevant for immigrants can be embedded in  
42 publications on ethnic minorities. We define ethnic minorities as a group within a community  
43 whose national or cultural traditions differ from those of the main population.<sup>37</sup> This includes  
44 immigrants, their descendants, and groups of people who were born in a certain country but still  
45 count as a minority (such as Hispanics, Native Americans, and Aborigines). On the service  
46  
47  
48  
49  
50  
51  
52  
53  
54  
55  
56  
57  
58  
59  
60

1  
2  
3  
4 provider side, we will include all types of health professionals and social service providers that are  
5 delivering personal services for ethnic minorities. This can include service providers from the  
6 public/state or the voluntary/non-profit sectors that work on social, health, or educational activities  
7 for ethnic minorities on a community level. Literature with researchers as participants on the  
8 provider side will be accepted, if the participating ethnic minority target group has been co-  
9 producing participatory research instead of merely being consulted on a certain research topic.  
10  
11  
12  
13  
14

### 15 (C) Concept

16 In this scoping review we will analyse co-production as it happens in the joint activity between  
17 immigrants and their service providers. This can happen either through ongoing personal interaction  
18 in which both parties perform most of the task together (eg, in a patient – physician consultation) or  
19 through processes in which citizens act separately for most of the time and only deal with the  
20 service provider at particular points, when the gains of their efforts are combined (eg, in between  
21 consultation appointments).<sup>38</sup> This includes face-to-face encounters in consultations as well as  
22 group activities such as shared medical appointments, in which immigrants co-produce strategies  
23 with their peers. Additionally, we will include publications on the relationship, communication, or  
24 collaboration between immigrants and service providers because they are strongly related to the  
25 concept of co-production and might entail co-productive elements. We will use a broad definition of  
26 communication, including verbal or non-verbal behaviour, interaction, and interpersonal  
27 knowledge, skills, and habits. Publications on community based participatory research will be  
28 included if immigrants (1) have been actively co-producing the research and (2) benefit from the  
29 value created by the research project. Framing the concept of co-production this way will allow us  
30 to include literature with an intention to co-produce service between immigrants and service  
31 providers, as well as publications with an unexpected, but retrospectively recognised, co-produced  
32 outcome.  
33  
34  
35  
36  
37  
38  
39  
40  
41  
42  
43  
44  
45  
46  
47

### 48 (C) Context

49 We will include two different arenas in which co-production by immigrants and care/service  
50 providers can occur: in healthcare and community settings. By healthcare, we mean the primary  
51 and secondary healthcare sector. Examples in primary healthcare are general practitioners,  
52 specialists, pharmacies, home care, nursing homes, and community nurses. In the secondary  
53  
54  
55  
56  
57  
58  
59  
60

1  
2  
3  
4 healthcare sector, public, private, somatic, and psychiatric hospitals will be included. All types of  
5 healthcare services available for patients in ambulatory care, day care, long term care and social  
6 care will also be included. The second arena includes community settings in which individual  
7 immigrant citizens or communities actively participate in delivering social services. The definition  
8 of social services used here is (1) they are *personal* services, rather than services related to the  
9 production of goods; (2) they fulfill personal *social* rather than physical or intellectual needs; (3)  
10 they focus on *social roles* rather than bodies, intellects or minds, thus distinguishing them from  
11 health, education and psychological assistance; and (4) they are performed person to person in  
12 direct *social interactions*.<sup>39</sup>  
13  
14  
15  
16  
17  
18  
19

20 Citations will be screened by using the web-based software Covidence ([www.covidence.org](http://www.covidence.org)).  
21 Covidence also facilitates the creation of a PRISMA flow diagram once the screening process is  
22 completed. Two reviewers (RKC and NA) will screen titles and abstracts against the PCC criteria  
23 and mark them “include,” “exclude,” “uncertain,” or “relevant for other purposes.” A summary of  
24 all inclusion and exclusion criteria in regard to form and content is shown in Table 1. To ensure  
25 reliability between the reviewers, the inclusion/exclusion criteria will be pilot tested on a random  
26 sample of citations. If no abstract can be identified, the publication will be dismissed. The reviewers  
27 will discuss uncertainties or differences. When in doubt, a third reviewer (vPC) will be consulted  
28 for the final decision. The same two reviewers will conduct the full text screening, which again will  
29 be pilot tested on a random sample of articles. No formal quality assessment will be performed.  
30  
31  
32  
33  
34  
35  
36  
37

#### 38 **Stage 4: Charting the data**

39 One reviewer (RKC) will extract the data using a descriptive charting table designed for this review.  
40 The charting table will be pretested in collaboration with the second reviewer (NA) on a minimum  
41 of five articles to ensure consistency of data extraction. At this stage, the charting table may be  
42 further refined if necessary. The following key information will be extracted:  
43  
44  
45

- 46 • author(s)
- 47 • year of publication
- 48 • publication type (eg, original research, report)
- 49 • study design
- 50 • population characteristic (eg, patient, citizen, ethnicity, sex, age, morbidity)
- 51 • provider characteristic (eg, profession)
- 52
- 53
- 54
- 55
- 56
- 57
- 58
- 59
- 60

- concept described (eg, co-production, patient involvement)
- context (eg, country, healthcare setting, community setting)
- intervention (eg, goal setting)
- key findings (eg, factors influencing the co-productive relationship between immigrants and service providers.)

Table 1

## Inclusion/exclusion criteria

|                                                                                                                                                                                                                                                                                                                                                                                                                                                                                                                                                                                                                                                                                                                                                                                                                                                                                                                                                                                                                                                                                                                                                                                                                                                                                                                                                                                                                                                                                                                                                                        |
|------------------------------------------------------------------------------------------------------------------------------------------------------------------------------------------------------------------------------------------------------------------------------------------------------------------------------------------------------------------------------------------------------------------------------------------------------------------------------------------------------------------------------------------------------------------------------------------------------------------------------------------------------------------------------------------------------------------------------------------------------------------------------------------------------------------------------------------------------------------------------------------------------------------------------------------------------------------------------------------------------------------------------------------------------------------------------------------------------------------------------------------------------------------------------------------------------------------------------------------------------------------------------------------------------------------------------------------------------------------------------------------------------------------------------------------------------------------------------------------------------------------------------------------------------------------------|
| Inclusion criteria are:                                                                                                                                                                                                                                                                                                                                                                                                                                                                                                                                                                                                                                                                                                                                                                                                                                                                                                                                                                                                                                                                                                                                                                                                                                                                                                                                                                                                                                                                                                                                                |
| <ul style="list-style-type: none"> <li>- <b>languages:</b> published in English, Danish, Swedish, Norwegian, or German languages</li> <li>- <b>date:</b> published from 2007 and onwards</li> <li>- <b>peer reviewed literature:</b> any study design and methodology</li> <li>- <b>non peer reviewed literature:</b> reports, government documents, guidelines, policy papers, and dissertations</li> <li>- <b>population:</b> Immigrants defined as foreign born people who have moved to another country for the purpose of settlement, as well as ethnic minority patients or citizens whose ethnicity and/or cultural traditions differ from those of the main population who co-produce services with healthcare/social providers or researchers</li> <li>- <b>co-production as method:</b> publications focusing on the joint creation of value for the co-producers through, for instance, the development, implementation, or evaluation of interventions, self-management plans, services, tools, or knowledge</li> <li>- <b>co-production as outcome:</b> publications that report on planned/unexpected co-produced outputs and outcomes, even if not initially planned</li> <li>- the co-producers both contribute resources and benefit from the value created by the service provided</li> <li>- publications that report on concrete improvement strategies for explicit collaboration or co-production between ethnic minorities and service providers</li> <li>- <b>setting:</b> co-production in healthcare or social/community settings</li> </ul> |
| Exclusion criteria are:                                                                                                                                                                                                                                                                                                                                                                                                                                                                                                                                                                                                                                                                                                                                                                                                                                                                                                                                                                                                                                                                                                                                                                                                                                                                                                                                                                                                                                                                                                                                                |
| <ul style="list-style-type: none"> <li>- publications on how to involve and increase immigrant participation in research, trials, or screening interventions (unless they were directly involved in the development and design of</li> </ul>                                                                                                                                                                                                                                                                                                                                                                                                                                                                                                                                                                                                                                                                                                                                                                                                                                                                                                                                                                                                                                                                                                                                                                                                                                                                                                                           |

these interventions and directly benefited from the value created through the research)

- publications focusing on co-production involving only more resourceful representatives of the immigrant target group
- publications focusing purely on consulting immigrants or service providers on their perspectives and opinions
- publications focusing on the recruitment/education of voluntary community (health) workers
- publications focusing only on the consequences of suboptimal immigrant – provider relationships
- publications on co-production on organisation level (eg, between hospital departments, with private organizations)

### **Stage 5: Collating, summarising and reporting the results**

The scoping review will give an overview of a relatively broad field of literature, including a wide range of different publication types. Therefore, special attention will be paid to how the large amount of data will be presented. A guideline specifically for reporting scoping reviews is currently being developed by a group of researchers at the University of Toronto, but it has not yet been published.<sup>40</sup> We will make efforts to secure use of this new guidance, but failing its availability, we will use a modified version of the Preferred Reporting Items for Systematic Reviews and Meta-Analysis (PRISMA).<sup>41</sup> PRISMA items not appropriate for the purpose of this scoping review (eg, risk of bias) will be left out. The extracted data will be presented in tabular or diagrammatic form to give an overview of the amount, type, and distribution of included literature. We will use NVivo software (version 11, QSR International) for coding and analyzing the literature.

The plan for data presentation and discussion is based on the three research questions for this scoping review. We expect to outline individual and context-related factors that influence co-production processes between immigrants and their service providers. In addition, we will analyse how the identified factors affect the respective co-production process. Despite the contextual and setting related differences between a community and a healthcare setting, we want to investigate whether the mechanisms behind co-production in a community setting can be used for learning and as a source of inspiration for the healthcare sector.

## IMPLICATIONS

Interest in understanding the needs of new and diverse groups of patients and creating health services that can meet these needs in an interdependent, patient centred way invites a new approach. “Co-production” may open up new perspectives and possibilities to improve the contribution of healthcare services to health. Findings of this study will provide an innovative perspective on the co-produced services by immigrant patients and care providers in Danish healthcare. This study represents the first step of a research programme designed to develop a model of co-production of healthcare services with immigrant patients. Such a model will be based on principles that can be useful in designing and evaluating patient centred healthcare services for immigrant patient groups, not only in a Danish context but potentially in any setting where immigrant patients or other minority patient groups meet their care providers. A timeline for the entire scoping review process is presented in Table 2.

Table 2

Timeline for protocol and scoping review

|                  | 2017 |     |     |      |     |     |     | 2018 |     |
|------------------|------|-----|-----|------|-----|-----|-----|------|-----|
|                  | Jun  | Jul | Aug | Sept | Oct | Nov | Dec | Jan  | Feb |
| Writing protocol | ■    | ■   |     |      |     |     |     |      |     |
| Search           |      | ■   | ■   | ■    |     |     |     |      |     |
| Screening        |      |     |     | ■    | ■   |     |     |      |     |
| Analysis         |      |     |     |      | ■   | ■   | ■   |      |     |
| Reporting        |      |     |     |      |     |     | ■   | ■    | ■   |

## ETHICS AND DISSEMINATION

This scoping review will include exclusively published data, gathered through searching the literature in electronic databases and other online sources. Thus, no ethics committee approval is required for this study. The protocol will support a systematic and transparent process of preparing and conducting the entire review process. The results will be disseminated through presentations at national and international clinical conferences, and in relevant seminars and networks on co-

1  
2  
3  
4 production and/or immigrant health to relevant stakeholders and immigrant patient groups, and will  
5 be published in a peer reviewed journal.  
6  
7

8  
9 **Acknowledgements:** The authors thank information specialist Line Bruun Hansen from the  
10 University Library at University of Southern Denmark, campus Esbjerg and librarian Berit Alving  
11 from the Videncentret at Odense University Hospital for their expertise provided in guiding the  
12 design of the draft search strategy for this scoping review.  
13  
14  
15

16  
17 **Contributors:** RKC drafted the protocol. NA, BP and SM helped conceptualize the research, and  
18 reviewed and edited the protocol. vPC obtained funding, conceptualized the research and reviewed  
19 and edited the protocol.  
20  
21  
22

23 **Competing interest:** None  
24  
25  
26

27 **Data sharing:** No additional data available  
28  
29

30 **Funding statement:** This study is financed by the Center for Quality in the Region of Southern  
31 Denmark and the Department of Regional Health Research at the University of Southern Denmark.  
32  
33  
34

35 **Ethics approval:** The scoping review will undertake an analysis of published data and does not  
36 require ethical approval.  
37  
38  
39

40 **Twitter:** Follow Christina Radl-Karimi at @ChristinaM\_RK  
41  
42  
43  
44  
45  
46  
47  
48  
49  
50  
51  
52  
53  
54  
55  
56  
57  
58  
59  
60

**REFERENCES**

1. Woodgate RL, Busolo DS, Crockett M, et al. A qualitative study on African immigrant and refugee families' experiences of accessing primary health care services in Manitoba, Canada: it's not easy! *International journal for equity in health* 2017;16
2. Suurmond J, Uiters E, de Bruijne MC, et al. Negative health care experiences of immigrant patients: a qualitative study. *BMC health services research* 2011;11(1):10.
3. Ahmed S, See S, Shommu N, et al. Experiences of communication barriers between physicians and immigrant patients: A systematic review and thematic synthesis. *Patient Experience Journal* 2017;4(1):122-40.
4. Burgess DJ, Fu SS, van Ryn M. Why Do Providers Contribute to Disparities and What Can Be Done About It? *Journal of general internal medicine* 2004;19(11):1154-9.
5. Sodemann M, Kristensen TR, Sangren H, et al. [Barriers to communication between clinicians and immigrants]. *Ugeskr Laeger* 2015;177(35)
6. Derosé KP, Escarce JJ, Lurie N. Immigrants and health care: sources of vulnerability. *Health affairs (Project Hope)* 2007;26(5):1258-68.
7. Fiscella K, Epstein RM. So much to do, so little time: Care for the socially disadvantaged and the 15-minute visit *Archives of internal medicine* 2008;168(17):1843-52.
8. Coulter A, Ellins J. Patient-focused interventions: A review of the evidence. London, UK: The Health Foundation, 2006.
9. Wagner EH, Austin BT, Davis C, et al. Improving chronic illness care: translating evidence into action. *Health affairs (Project Hope)* 2001;20(6):64-78.
10. Ministry of Health. Nationalt Kvalitetsprogram for Sundhedsområdet 2015-2018. Copenhagen, DK, 2015.
11. Saha S, Beach MC, Cooper LA. Patient Centeredness, Cultural Competence and Healthcare Quality. *Journal of the National Medical Association* 2008;100(11):1275-85.
12. Street RL, Gordon HS, Michael MW, et al. Patient Participation in Medical Consultations: Why Some Patients Are More Involved Than Others. *Medical Care* 2005;43(10):960-69.
13. Millenson ML. When "patient centred" is no longer enough: the challenge of collaborative health: an essay by Michael L Millenson. *BMJ (Clinical research ed)* 2017;358
14. Shay LA. Where is the evidence? A systematic review of shared decision making. 2015;35(1):114-31.
15. Batalden M, Batalden P, Margolis P, et al. Coproduction of healthcare service. *BMJ quality & safety* 2015;0:1-9.
16. Ostrom E. Crossing the great divide: Coproduction, synergy, and development. *World Development* 1996;24(6):1073-87.



17. Palumbo R. Contextualizing co-production of health care: a systematic literature review. *International Journal of Public Sector Management* 2015;29(1):72-90.
18. Voorberg WH, Bekkers VJJM, Tummers LG. A Systematic Review of Co-Creation and Co-Production: Embarking on the social innovation journey. *Public Management Review* 2015;17(9):1333-57.
19. Batalden P. A reflection on "Coproduct of healthcare service" (September 2017): The Dartmouth Institute, 2017.
20. Osborne SP, Radnor Z, Strokosch K. Co-Production and the Co-Creation of Value in Public Services: A suitable case for treatment? *Public Management Review* 2016;18(5):639-53.
21. Essén A, Värlander SW, Liljedal KT. Co-production in chronic care: exploitation and empowerment. *European Journal of Marketing* 2016;50(5/6):724-51.
22. Poulsen L. Embedsmandsrollen i borgerdrevet samskabelse - En ny kommunal embedsmandsrolle [The role of public officials in citizen-driven partnership]. Roskilde University, 2017.
23. Færch C. Borgerdrevet samskabelse i kommunerne - Embedsmændenes nye rolle [Citizen-driven co-production in municipalities]. Roskilde University, 2017.
24. Jakobsen M, Andersen SC. Coproduction and Equity in Public Service Delivery. *Public Adm Rev* 2013;73(5):704-13.
25. Andersen LL, Espersen HH. Partnerskaber og samarbejder mellem det offentlige og civilsamfundet. [Partnerships and cooperation between the public sector and the civil society]. Copenhagen: Socialstyrelsen [The National Board of Social Services], 2017.
26. Tortzen A. Samskabelse i kommunale rammer - hvordan kan ledelse understøtte samskabelse [Coproduction in the municipal sector]. Roskilde University, DK, 2016.
27. Turnaas S. The Professional Side of Co-Production. University of Tampere, 2016.
28. Arksey H, O'Malley L. Scoping studies: towards a methodological framework. *International Journal of Social Research Methodology* 2005;8(1):19-32.
29. Levac D, Colquhoun H, O'Brien KK. Scoping studies: advancing the methodology. *Implementation Science* 2010;5(1):69.
30. Peters MDJ, Godfrey CM, McInerney P, et al. The Joanna Briggs Institute Reviewers' Manual 2015: Methodology for JBI Scoping Reviews. Adelaide, AUS: The Joanna Briggs Institute, 2015.
31. Bate P. Context is everything. In *Perspectives on Context*. London: The Health Foundation, 2014:1-29.
32. Laine C, Davidoff F. Patient-centered medicine: A professional evolution. *Jama* 1996;275(2):152-56.

- 1  
2  
3  
4 33. Loeffler E, Power G, Bovaird T, et al. Co-production of health and wellbeing in Scotland. Birmingham, UK: Governance International, 2013.
- 5  
6  
7 34. Perruchoud R, Redpath-Cross J. Glossary on Migration. Book Glossary on Migration. Geneva: International Organisation for Migration (IOM), 2011.
- 8  
9  
10 35. Esholdt H, Fuglsang M. Etniske forskelle i patienters oplevelser [Ethnic differences in patient experiences]. Region Hovedstaden: Enheden for Brugerundersøgelser, 2009.
- 11  
12  
13 36. Jervelund SS, Malik S, Ahlmark N, et al. Morbidity, Self-Perceived Health and Mortality Among non-Western Immigrants and Their Descendants in Denmark in a Life Phase Perspective. *J Immigr Minor Health* 2017;19(2):448-76.
- 14  
15  
16  
17 37. Oxford Dictionaries. Definition of "ethnic minority" in English: Oxford University Press; [Available from: [https://en.oxforddictionaries.com/definition/ethnic\\_minority](https://en.oxforddictionaries.com/definition/ethnic_minority) accessed October 24, 2017.
- 18  
19  
20  
21 38. Alford J. Engaging public sector clients: from service-delivery to co-production. New York: Palgrave Macmillan 2009.
- 22  
23  
24 39. Bahle T. The changing institutionalization of social services in England and Wales, France and Germany: is the welfare state on the retreat? *Journal of European Social Policy* 2003;13(1):5-20.
- 25  
26  
27 40. Colquhoun HL, Levac D, O'Brien KK, et al. Scoping reviews: time for clarity in definition, methods, and reporting. *Journal of Clinical Epidemiology* 2014;67(12):1291-94.
- 28  
29  
30 41. Moher D, Liberati A, Tetzlaff J, et al. Preferred reporting items for systematic reviews and meta-analyses: the PRISMA statement. *PLoS medicine* 2009;6(7):e1000097.
- 31  
32  
33  
34  
35  
36  
37  
38  
39  
40  
41  
42  
43  
44  
45  
46  
47  
48  
49  
50  
51  
52  
53  
54  
55  
56  
57  
58  
59  
60

1  
2  
3  
4  
5  
6  
7  
8  
9  
10  
11  
12  
13  
14  
15  
16  
17  
18  
19  
20  
21  
22  
23  
24  
25  
26  
27  
28  
29  
30  
31  
32  
33  
34  
35  
36  
37  
38  
39  
40  
41  
42  
43  
44  
45  
46  
47  
48  
49  
50  
51  
52  
53  
54  
55  
56  
57  
58  
59  
60

## Appendix 1 – Search strategy in PubMed, August 16th 2017

|    | <b>Search terms</b>                                                                                                                                                                                                                                                                      | <b>Results</b> |
|----|------------------------------------------------------------------------------------------------------------------------------------------------------------------------------------------------------------------------------------------------------------------------------------------|----------------|
| 1  | Coproduction OR co-production OR coproduce OR co-produce OR coproducing OR co-producing                                                                                                                                                                                                  | 1474           |
| 2  | Cocreation OR co-creation OR cocreate OR co-create OR cocreating OR co-creating                                                                                                                                                                                                          | 320            |
| 3  | Codesign OR co-design OR codesigning OR co-designing                                                                                                                                                                                                                                     | 246            |
| 4  | Cooperation OR co-operation OR cooperate OR co-operate OR cooperating OR co-operating                                                                                                                                                                                                    | 62062          |
| 5  | Collaboration OR collaborate OR collaborating                                                                                                                                                                                                                                            | 64249          |
| 6  | Co-care                                                                                                                                                                                                                                                                                  | 10             |
| 7  | “public participation” OR “public involvement” OR “public empowerment” OR “public activation”                                                                                                                                                                                            | 1239           |
| 8  | “community participation” OR “community involvement” OR “community empowerment” OR “community activation”                                                                                                                                                                                | 4504           |
| 9  | “patient participation” OR “patient involvement” OR “patient empowerment” OR “patient activation”                                                                                                                                                                                        | 4864           |
| 10 | “Relationship-centered care” OR “relationship-centred care”                                                                                                                                                                                                                              | 139            |
| 11 | “patient-centered care” OR “patient-centred care” OR “patient-focused care”                                                                                                                                                                                                              | 4758           |
| 12 | “patient-centered nursing” OR “patient-centred nursing”                                                                                                                                                                                                                                  | 74             |
| 13 | “patient-centered communication” OR “patient-centred communication”                                                                                                                                                                                                                      | 455            |
| 14 | Patient-centeredness OR patient-centredness                                                                                                                                                                                                                                              | 1032           |
| 15 | “shared decision-making”                                                                                                                                                                                                                                                                 | 4731           |
| 16 | “cross-cultural communication”                                                                                                                                                                                                                                                           | 164            |
| 17 | “patient-provider relation” OR “patient-provider relations” OR “patient-provider relationship” OR “patient-provider relationships” OR “patient-provider communication” OR “patient-provider communications” OR “patient-provider interaction” OR “patient-provider interactions”         | 1578           |
| 18 | “patient-physician relation” OR “patient-physician relations” OR “patient-physician relationship” OR “patient-physician relationships” OR “patient-physician communication” OR “patient-physician communications” OR “patient-physician interaction” OR “patient-physician interactions” | 2007           |
| 19 | “patient-doctor relation” OR “patient-doctor relations” OR “patient-doctor relationship” OR “patient-doctor relationships” OR “patient-doctor communication” OR “patient-doctor communications” OR “patient-doctor interaction” OR “patient-doctor interactions”                         | 743            |
| 20 | “patient-nurse relation” OR “patient-nurse relations” OR “patient-nurse relationship” OR “patient-nurse relationships” OR “patient-nurse communication” OR “patient-nurse communications” OR “patient-nurse interaction” OR “patient-nurse interactions”                                 | 148            |
| 21 | “patient-hospital relation” OR “patient-hospital relations” OR “patient-hospital relationship” OR “patient-hospital relationships” OR “patient-hospital communication” OR “patient-hospital communications” OR “patient-hospital interaction” OR “patient-hospital interactions”         | 9              |
| 22 | (((((“Patient Participation”[Mesh]) OR “Community Participation”[Mesh]) OR “Patient-Centered Care”[Mesh]) OR “Decision Making”[Mesh]) OR                                                                                                                                                 | 268936         |

|    |                                                                                                                                             |             |
|----|---------------------------------------------------------------------------------------------------------------------------------------------|-------------|
|    | "Hospital-Patient Relations"[Mesh]) OR "Physician-Patient Relations"[Mesh]                                                                  |             |
| 23 | Or/1-22                                                                                                                                     | 402703      |
| 24 | Migrant OR migrants                                                                                                                         | 15667       |
| 25 | Immigrant OR immigrants                                                                                                                     | 21054       |
| 26 | "ethnic minority" OR "ethnic minorities" OR "ethnic minority group" OR "ethnic minority groups"                                             | 8571        |
| 27 | Refugee OR refugees                                                                                                                         | 8095        |
| 28 | "asylum seeker" OR "asylum seekers"                                                                                                         | 1075        |
| 29 | Descendant OR descendants                                                                                                                   | 4736        |
| 30 | "undocumented immigrant" OR "undocumented immigrants" OR "illegal immigrant" OR "illegal immigrants"                                        | 448         |
| 31 | ((("Emigrants and Immigrants"[Mesh]) OR "Transients and Migrants"[Mesh]) OR "Refugees"[Mesh]) OR "Undocumented Immigrants"[Mesh]            | 25136       |
| 32 | OR/24-31                                                                                                                                    | 60882       |
| 33 | "healthcare service" OR "healthcare services" OR "health care service" OR "health care services"                                            | 18690       |
| 34 | "social service" OR "social services"                                                                                                       | 9253        |
| 35 | "community service" OR "community services"                                                                                                 | 3558        |
| 36 | "community welfare"                                                                                                                         | 69          |
| 37 | "social welfare"                                                                                                                            | 3692        |
| 38 | "delivery of healthcare" OR "delivery of health care"                                                                                       | 11032       |
| 39 | "Integrated delivery of healthcare" OR "Integrated delivery of health care"                                                                 | 15          |
| 40 | ((("Health Services"[Mesh]) OR ("Delivery of Health Care"[Mesh] OR "Delivery of Health Care, Integrated"[Mesh])) OR "Social Welfare"[Mesh]) | 2412683     |
| 41 | OR/33-37                                                                                                                                    | 2425575     |
| 42 | 23 AND 32 AND 38                                                                                                                            | 1725        |
| 43 | 23 AND 32 AND 38 only: English, Swedish, Norwegian, Danish, German                                                                          | 1640        |
| 44 | <b>From 2007 onwards</b>                                                                                                                    | <b>1018</b> |

**PRISMA-P (Preferred Reporting Items for Systematic review and Meta-Analysis Protocols) 2015 checklist: recommended items to address in a systematic review protocol\***

| Section and topic                 | Item No | Checklist item                                                                                                                                                                                                                                                                                                                             |
|-----------------------------------|---------|--------------------------------------------------------------------------------------------------------------------------------------------------------------------------------------------------------------------------------------------------------------------------------------------------------------------------------------------|
| <b>ADMINISTRATIVE INFORMATION</b> |         |                                                                                                                                                                                                                                                                                                                                            |
| Title:                            |         |                                                                                                                                                                                                                                                                                                                                            |
| Identification                    | 1a      | Identify the report as a protocol of a systematic review <a href="#">page 1</a>                                                                                                                                                                                                                                                            |
| Update                            | 1b      | If the protocol is for an update of a previous systematic review, identify as such <a href="#">N.A.*</a>                                                                                                                                                                                                                                   |
| Registration                      | 2       | If registered, provide the name of the registry (such as PROSPERO) and registration number <a href="#">N.A.</a>                                                                                                                                                                                                                            |
| Authors:                          |         |                                                                                                                                                                                                                                                                                                                                            |
| Contact                           | 3a      | Provide name, institutional affiliation, e-mail address of all protocol authors; provide physical mailing address of corresponding author <a href="#">page 1</a>                                                                                                                                                                           |
| Contributions                     | 3b      | Describe contributions of protocol authors and identify the guarantor of the review <a href="#">page 14</a>                                                                                                                                                                                                                                |
| Amendments                        | 4       | If the protocol represents an amendment of a previously completed or published protocol, identify as such and list changes; otherwise, state plan for documenting important protocol amendments <a href="#">N.A.</a>                                                                                                                       |
| Support:                          |         |                                                                                                                                                                                                                                                                                                                                            |
| Sources                           | 5a      | Indicate sources of financial or other support for the review <a href="#">page 14 (Acknowledgements)</a>                                                                                                                                                                                                                                   |
| Sponsor                           | 5b      | Provide name for the review funder and/or sponsor <a href="#">page 14</a>                                                                                                                                                                                                                                                                  |
| Role of sponsor or funder         | 5c      | Describe roles of funder(s), sponsor(s), and/or institution(s), if any, in developing the protocol <a href="#">page 14 (no competing interests)</a>                                                                                                                                                                                        |
| <b>INTRODUCTION</b>               |         |                                                                                                                                                                                                                                                                                                                                            |
| Rationale                         | 6       | Describe the rationale for the review in the context of what is already known <a href="#">page 5-6</a>                                                                                                                                                                                                                                     |
| Objectives                        | 7       | Provide an explicit statement of the question(s) the review will address with reference to participants, interventions, comparators, and outcomes (PICO) <a href="#">page 6</a>                                                                                                                                                            |
| <b>METHODS</b>                    |         |                                                                                                                                                                                                                                                                                                                                            |
| Eligibility criteria              | 8       | Specify the study characteristics (such as PICO, study design, setting, time frame) and report characteristics (such as years considered, language, publication status) to be used as criteria for eligibility for the review<br><a href="#">Described in detail on pages 7-10</a><br><a href="#">Summarized in Table 1 on pages 11-12</a> |
| Information sources               | 9       | Describe all intended information sources (such as electronic databases, contact with study authors, trial registers or other grey literature sources) with planned dates of coverage <a href="#">page 7</a>                                                                                                                               |
| Search strategy                   | 10      | Present draft of search strategy to be used for at least one electronic database, including planned limits, such that it could be                                                                                                                                                                                                          |

|                                    |     |                                                                                                                                                                                                                                                                       |
|------------------------------------|-----|-----------------------------------------------------------------------------------------------------------------------------------------------------------------------------------------------------------------------------------------------------------------------|
|                                    |     | repeated <a href="#">Appendix 1</a>                                                                                                                                                                                                                                   |
| Study records:                     |     |                                                                                                                                                                                                                                                                       |
| Data management                    | 11a | Describe the mechanism(s) that will be used to manage records and data throughout the review <a href="#">page 10</a>                                                                                                                                                  |
| Selection process                  | 11b | State the process that will be used for selecting studies (such as two independent reviewers) through each phase of the review (that is, screening, eligibility and inclusion in meta-analysis) <a href="#">page 10</a>                                               |
| Data collection process            | 11c | Describe planned method of extracting data from reports (such as piloting forms, done independently, in duplicate), any processes for obtaining and confirming data from investigators <a href="#">page 10-11</a>                                                     |
| Data items                         | 12  | List and define all variables for which data will be sought (such as PICO items, funding sources), any pre-planned data assumptions and simplifications <a href="#">page 10-11</a>                                                                                    |
| Outcomes and prioritization        | 13  | List and define all outcomes for which data will be sought, including prioritization of main and additional outcomes, with rationale <a href="#">page 12 (based on research questions)</a>                                                                            |
| Risk of bias in individual studies | 14  | Describe anticipated methods for assessing risk of bias of individual studies, including whether this will be done at the outcome or study level, or both; state how this information will be used in data synthesis <a href="#">N.A.</a>                             |
| Data synthesis                     | 15a | Describe criteria under which study data will be quantitatively synthesised <a href="#">N.A.</a>                                                                                                                                                                      |
|                                    | 15b | If data are appropriate for quantitative synthesis, describe planned summary measures, methods of handling data and methods of combining data from studies, including any planned exploration of consistency (such as $I^2$ , Kendall's $\tau$ ) <a href="#">N.A.</a> |
|                                    | 15c | Describe any proposed additional analyses (such as sensitivity or subgroup analyses, meta-regression) <a href="#">N.A.</a>                                                                                                                                            |
|                                    | 15d | If quantitative synthesis is not appropriate, describe the type of summary planned <a href="#">page 12</a>                                                                                                                                                            |
| Meta-bias(es)                      | 16  | Specify any planned assessment of meta-bias(es) (such as publication bias across studies, selective reporting within studies) <a href="#">N.A.</a>                                                                                                                    |
| Confidence in cumulative evidence  | 17  | Describe how the strength of the body of evidence will be assessed (such as GRADE) <a href="#">N.A.</a>                                                                                                                                                               |

[N.A.\\* = Not applicable](#)

**\* It is strongly recommended that this checklist be read in conjunction with the PRISMA-P Explanation and Elaboration (cite when available) for important clarification on the items. Amendments to a review protocol should be tracked and dated. The copyright for PRISMA-P (including checklist) is held by the PRISMA-P Group and is distributed under a Creative Commons Attribution Licence 4.0.**

*From: Shamseer L, Moher D, Clarke M, Ghersi D, Liberati A, Petticrew M, Shekelle P, Stewart L, PRISMA-P Group. Preferred reporting items for systematic review and meta-analysis protocols (PRISMA-P) 2015: elaboration and explanation. *BMJ*. 2015 Jan 2;349(jan02 1):g7647.*
