# Supplementary material for: Coproduction of healthcare service with immigrant patients: protocol of a scoping review
Source: PubMed Central journal article supplement — BMJ Open. 2018 Feb 3;8(2):e019519. doi: 10.1136/bmjopen-2017-019519 (PMC5829924; doi:10.1136/bmjopen-2017-019519), 2018-02-03
Supplement: bmjopen-2017-019519supp001.pdf [file bmjopen-2017-019519supp001.pdf]

## Appendix 1 – Search strategy in PubMed, August 16th 2017

|    | <b>Search terms</b>                                                                                                                                                                                                                                                                      | <b>Results</b> |
|----|------------------------------------------------------------------------------------------------------------------------------------------------------------------------------------------------------------------------------------------------------------------------------------------|----------------|
| 1  | Coproduction OR co-production OR coproduce OR co-produce OR coproducing OR co-producing                                                                                                                                                                                                  | 1474           |
| 2  | Cocreation OR co-creation OR cocreate OR co-create OR cocreating OR co-creating                                                                                                                                                                                                          | 320            |
| 3  | Codesign OR co-design OR codesigning OR co-designing                                                                                                                                                                                                                                     | 246            |
| 4  | Cooperation OR co-operation OR cooperate OR co-operate OR cooperating OR co-operating                                                                                                                                                                                                    | 62062          |
| 5  | Collaboration OR collaborate OR collaborating                                                                                                                                                                                                                                            | 64249          |
| 6  | Co-care                                                                                                                                                                                                                                                                                  | 10             |
| 7  | “public participation” OR “public involvement” OR “public empowerment” OR “public activation”                                                                                                                                                                                            | 1239           |
| 8  | “community participation” OR “community involvement” OR “community empowerment” OR “community activation”                                                                                                                                                                                | 4504           |
| 9  | “patient participation” OR “patient involvement” OR “patient empowerment” OR “patient activation”                                                                                                                                                                                        | 4864           |
| 10 | “Relationship-centered care” OR “relationship-centred care”                                                                                                                                                                                                                              | 139            |
| 11 | “patient-centered care” OR “patient-centred care” OR “patient-focused care”                                                                                                                                                                                                              | 4758           |
| 12 | “patient-centered nursing” OR “patient-centred nursing”                                                                                                                                                                                                                                  | 74             |
| 13 | “patient-centered communication” OR “patient-centred communication”                                                                                                                                                                                                                      | 455            |
| 14 | Patient-centeredness OR patient-centredness                                                                                                                                                                                                                                              | 1032           |
| 15 | “shared decision-making”                                                                                                                                                                                                                                                                 | 4731           |
| 16 | “cross-cultural communication”                                                                                                                                                                                                                                                           | 164            |
| 17 | “patient-provider relation” OR “patient-provider relations” OR “patient-provider relationship” OR “patient-provider relationships” OR “patient-provider communication” OR “patient-provider communications” OR “patient-provider interaction” OR “patient-provider interactions”         | 1578           |
| 18 | “patient-physician relation” OR “patient-physician relations” OR “patient-physician relationship” OR “patient-physician relationships” OR “patient-physician communication” OR “patient-physician communications” OR “patient-physician interaction” OR “patient-physician interactions” | 2007           |
| 19 | “patient-doctor relation” OR “patient-doctor relations” OR “patient-doctor relationship” OR “patient-doctor relationships” OR “patient-doctor communication” OR “patient-doctor communications” OR “patient-doctor interaction” OR “patient-doctor interactions”                         | 743            |
| 20 | “patient-nurse relation” OR “patient-nurse relations” OR “patient-nurse relationship” OR “patient-nurse relationships” OR “patient-nurse communication” OR “patient-nurse communications” OR “patient-nurse interaction” OR “patient-nurse interactions”                                 | 148            |
| 21 | “patient-hospital relation” OR “patient-hospital relations” OR “patient-hospital relationship” OR “patient-hospital relationships” OR “patient-hospital communication” OR “patient-hospital communications” OR “patient-hospital interaction” OR “patient-hospital interactions”         | 9              |
| 22 | (((((“Patient Participation”[Mesh]) OR “Community Participation”[Mesh]) OR “Patient-Centered Care”[Mesh]) OR “Decision Making”[Mesh]) OR                                                                                                                                                 | 268936         |

|    |                                                                                                                                             |             |
|----|---------------------------------------------------------------------------------------------------------------------------------------------|-------------|
|    | "Hospital-Patient Relations"[Mesh]) OR "Physician-Patient Relations"[Mesh]                                                                  |             |
| 23 | Or/1-22                                                                                                                                     | 402703      |
| 24 | Migrant OR migrants                                                                                                                         | 15667       |
| 25 | Immigrant OR immigrants                                                                                                                     | 21054       |
| 26 | “ethnic minority” OR “ethnic minorities” OR “ethnic minority group” OR “ethnic minority groups”                                             | 8571        |
| 27 | Refugee OR refugees                                                                                                                         | 8095        |
| 28 | “asylum seeker” OR “asylum seekers”                                                                                                         | 1075        |
| 29 | Descendant OR descendants                                                                                                                   | 4736        |
| 30 | “undocumented immigrant” OR “undocumented immigrants” OR “illegal immigrant” OR “illegal immigrants”                                        | 448         |
| 31 | ((("Emigrants and Immigrants"[Mesh]) OR "Transients and Migrants"[Mesh]) OR "Refugees"[Mesh]) OR "Undocumented Immigrants"[Mesh]            | 25136       |
| 32 | OR/24-31                                                                                                                                    | 60882       |
| 33 | “healthcare service” OR “healthcare services” OR “health care service” OR “health care services”                                            | 18690       |
| 34 | “social service” OR “social services”                                                                                                       | 9253        |
| 35 | “community service” OR “community services”                                                                                                 | 3558        |
| 36 | “community welfare”                                                                                                                         | 69          |
| 37 | “social welfare”                                                                                                                            | 3692        |
| 38 | “delivery of healthcare” OR “delivery of health care”                                                                                       | 11032       |
| 39 | “Integrated delivery of healthcare” OR “Integrated delivery of health care”                                                                 | 15          |
| 40 | ((("Health Services"[Mesh]) OR ("Delivery of Health Care"[Mesh] OR "Delivery of Health Care, Integrated"[Mesh])) OR "Social Welfare"[Mesh]) | 2412683     |
| 41 | OR/33-37                                                                                                                                    | 2425575     |
| 42 | 23 AND 32 AND 38                                                                                                                            | 1725        |
| 43 | 23 AND 32 AND 38 only: English, Swedish, Norwegian, Danish, German                                                                          | 1640        |
| 44 | <b>From 2007 onwards</b>                                                                                                                    | <b>1018</b> |
